# Supplementary material for: A saturation mutagenesis screen uncovers resistant and sensitizing secondary KRAS mutations to clinical KRASG12C inhibitors
Source: PubMed Central journal article supplement — Proc Natl Acad Sci U S A. 2022 Apr 26;119(18):e2120512119. doi: 10.1073/pnas.2120512119 (PMC9170150; doi:10.1073/pnas.2120512119), 2022-04-26
Supplement: pnas.2120512119.sapp.pdf [file pnas.2120512119.sapp.pdf]

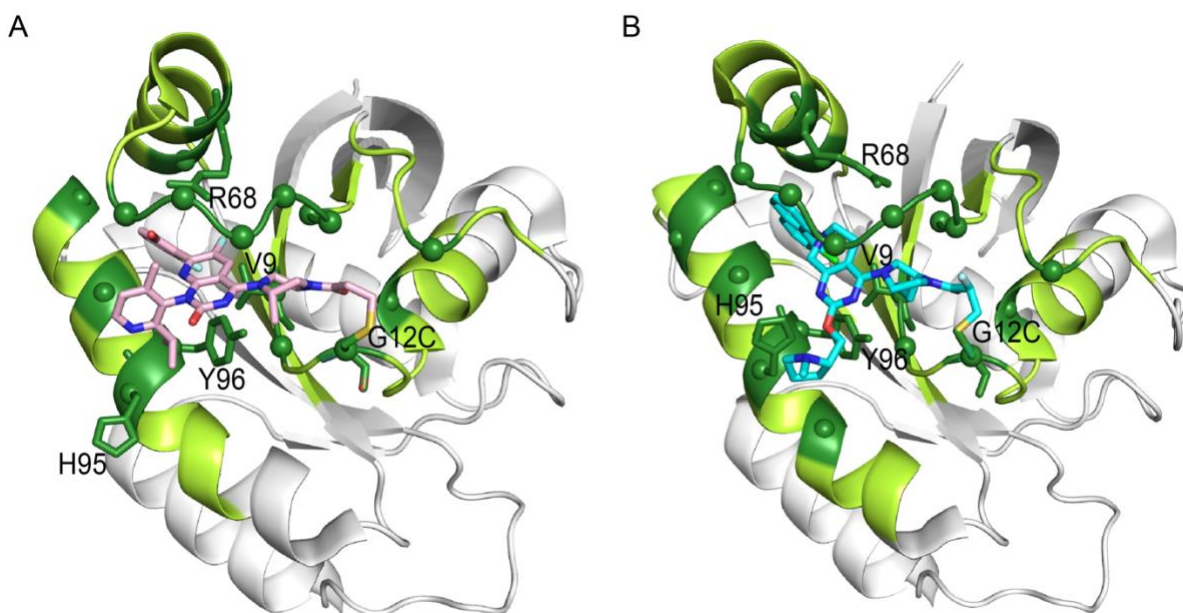

**Fig.S1. Co-crystal structures of KRAS<sup>G12C</sup> inhibitors bound to KRAS<sup>G12C</sup> protein.**

(A) A comparison of sotarasib (pink) and (B) adagrasib (cyan) bound to KRAS<sup>G12C</sup> protein. Residues that are within 5 Å distance of the small molecule inhibitor are designated as the first shell contacts and are marked in dark green; residues that are within 5 Å distance of the first shell are marked in light green. V9, G12C, R68, H95, Y96 are represented by stick models. V9, R68 and Y96 residues are all involved in the drug-protein interface in both co-crystal structures. However, the His95 is engaging in the interaction with adagrasib (B) but not with sotarasib (A).

- 250-bp paired-end sequencing for bot 5' and 3' ends
- 200bp single-end sequencing for the middle region

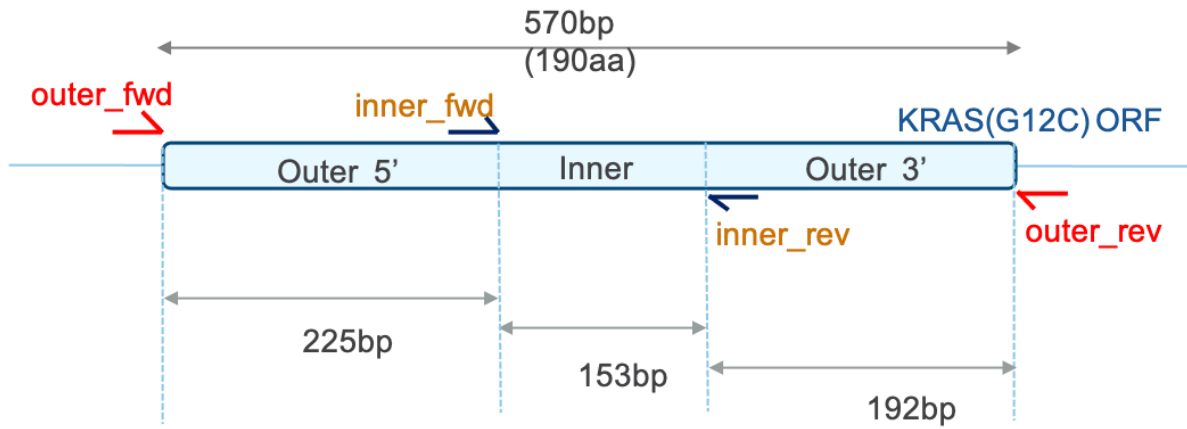

**Fig.S2. Sequencing strategy for detecting all variants across the entire KRAS ORF. A long amplicon was amplified by the “outer” primer set and a short amplicon covering the middle region was amplified by the “inter” primer set.**

**Table S1. Z-score analysis of the saturation mutagenesis screen results. Rows represent the positions at KRAS<sup>G12C</sup> protein, columns represent the specific substitutions.**

Average Z-score from sotarasib-treated groups

| position | A     | C     | D     | E     | F     | G     | H     | I     | K     | L     | M     | N     | P     | Q     | R     | S     | T     | V     | W     | Y     |
|----------|-------|-------|-------|-------|-------|-------|-------|-------|-------|-------|-------|-------|-------|-------|-------|-------|-------|-------|-------|-------|
| 2        | -0.03 | -0.26 | -0.95 | -0.51 | -0.06 | -0.26 | -0.24 | 0.76  | -0.10 | -1.11 | -0.29 | -0.36 | -0.76 | -0.32 | -0.17 | 0.92  |       | -0.66 | -0.65 | -0.61 |
| 3        | 0.11  | -0.36 | -0.20 |       | -0.84 | -0.43 | -0.68 | -0.02 | -0.40 | -1.11 | 0.18  | 0.78  | -0.38 | -0.60 | -0.52 | -0.47 | 0.17  | -0.05 | 0.23  | -0.82 |
| 4        | -1.10 | -0.05 | -0.35 | 1.29  | 0.22  | -0.99 | -0.87 | 0.52  | 0.15  | -0.32 | -1.02 | -0.02 | 1.21  | -0.24 | -0.90 | -0.64 | -0.40 | -0.77 | -0.33 |       |
| 5        | 1.49  | 0.19  | -0.34 | 0.34  | -0.36 | 0.01  | 0.25  | -0.35 |       | 0.23  | -0.39 | 0.36  | -0.53 | 0.35  | -0.58 | -0.89 | -0.30 | -0.32 | -1.06 | -0.36 |
| 6        | -0.52 | -0.57 | 0.32  | -0.84 | -0.65 | -0.65 | 1.01  | -0.53 | -0.82 |       | -0.08 | -0.77 | -0.38 | -0.61 | -0.23 | 0.64  | 0.39  | 0.92  | 0.64  | 0.38  |
| 7        | -1.37 | -0.47 | -0.47 | 0.06  | 0.34  | 0.23  | -1.32 | 0.11  | -0.46 | -0.25 | 0.09  | 0.42  | 0.58  | 1.32  | 0.74  | 0.00  | -0.21 |       | -0.60 | -0.47 |
| 8        | 1.95  | 1.44  | -0.57 | 2.55  | 2.39  | 1.14  | 1.95  | 0.13  | 0.72  | 3.08  | 1.02  | 1.36  | 1.09  | 1.99  | -0.81 | 1.28  | 2.00  |       | 0.02  | -0.71 |
| 9        | -0.44 | -0.62 | 1.04  | 1.69  | 1.97  | 0.08  | 3.47  | -0.62 | 1.45  | 0.80  | 0.28  | 0.01  | -0.73 | 1.26  | 3.30  | -0.05 | 0.08  |       | 2.77  | 3.41  |
| 10       | 0.50  | -0.63 | -0.57 | -0.27 | -0.51 |       | -0.24 | -0.12 | 0.17  | 0.46  | -0.37 | -0.53 | -0.56 | 0.21  | 0.44  | 0.15  | -0.24 | -0.14 | -0.07 | 0.37  |
| 11       |       | -0.38 | 0.68  | -0.46 | -0.11 | 0.06  | 0.45  | 0.29  | 0.23  | 0.54  | 1.03  | 0.71  | -0.31 | -0.02 | 2.44  | 1.10  | 0.34  | -0.28 | -0.17 | -0.31 |
| 12       | 1.49  |       | 1.73  | 2.60  | 2.76  | -0.18 | 3.29  | 2.04  | 1.40  | 1.62  | 2.05  | 3.26  | 0.51  | 0.24  | 0.81  | 1.26  | 1.74  | 0.88  | 1.27  | 2.19  |
| 13       | -0.26 | -1.09 | 1.30  | 1.72  | 0.61  |       | -0.07 | 0.22  | -0.01 | 1.27  | 0.27  | -0.24 | 0.51  | 0.81  | 0.30  | 0.02  | 0.83  | 0.49  | 0.03  | -0.24 |
| 14       | -0.34 | -0.12 | -1.12 | -1.24 | -2.14 | 0.13  | -0.23 | -0.85 | -0.03 | 0.65  | -0.48 | 0.40  | 0.34  | -0.54 | -0.08 | 1.38  | -0.51 |       | -0.39 | -0.44 |
| 15       | -0.64 | -0.41 | 0.37  | -1.81 | -1.28 |       | -1.34 | -1.68 | -0.74 | -1.66 | -1.38 | -0.51 | -0.53 | -1.13 | -1.37 | -0.57 | -1.30 | -1.19 | -0.61 | -1.04 |
| 16       | -0.56 | -0.65 | -0.27 | 0.05  | 0.22  | 0.47  | -0.20 | -1.13 |       | -0.87 | -0.13 | -0.39 | -1.01 | 0.10  | -1.07 | -0.04 | -1.23 | -0.71 | -0.30 | -0.38 |
| 17       | -0.42 | -1.47 | -0.18 | -1.83 | -0.49 | -0.86 | 0.16  | -1.09 | -2.03 | -0.41 | -0.85 | -1.28 | 0.25  | -0.51 | -0.39 |       | -0.30 | -0.28 | 0.18  | 1.43  |
| 18       |       | -0.22 | -0.93 | 0.75  | -0.67 | -0.42 | -0.21 | -0.67 | -0.19 | -0.65 | 0.17  | -0.45 | 0.04  | -0.42 | 0.04  | 0.71  | 0.07  | -0.02 | -0.32 | -0.53 |
| 19       | 0.56  | -0.41 | -0.69 | -0.83 | -0.59 | -0.05 | -0.66 | -0.10 | -0.57 |       | -0.02 | 0.23  | 0.59  | 0.69  | 0.36  | -0.70 | 0.16  | -0.09 | -0.26 | 0.75  |
| 20       | -0.92 | 1.08  | -0.45 | -0.82 | -0.36 | 0.40  | -0.26 | 0.92  | -0.30 | 0.63  | -0.28 | 0.85  | 0.46  | 0.20  | 0.26  | 0.52  |       | -0.12 | -0.85 | -0.05 |
| 21       | 0.27  | -0.48 | -0.66 | -0.75 | -0.81 | 0.55  | 0.41  |       | 0.47  | 0.29  | 0.10  | -0.87 | 0.00  | 0.66  | 0.01  | -0.62 | 0.26  | 0.04  | 1.03  | -0.35 |
| 22       | 0.02  | -0.68 | -0.59 | -0.13 | 0.41  | 0.75  | 0.16  | 0.49  | 0.25  | -0.05 | -0.41 | -0.69 | -0.92 |       | 0.17  | 0.27  | 0.52  | -0.47 | -0.06 | -0.61 |
| 23       | -0.65 | -0.03 | -0.53 | -1.00 | -0.89 | 0.25  | -0.62 | 0.76  | -1.04 |       | -1.55 | 0.16  | 0.57  | -0.01 | 0.09  | 0.39  | -0.48 | 0.22  | -1.03 | 0.44  |
| 24       | 1.42  | -0.32 | 0.31  | 0.30  | 0.14  | 0.29  | -0.30 |       | -1.50 | -1.43 | 0.03  | 0.12  | -1.44 | 0.00  | 0.27  | -0.49 | 0.21  | 0.53  | -0.34 | -0.18 |
| 25       | 1.58  | -0.32 | -0.63 | 0.34  | -0.65 | -0.48 | 0.37  | -0.55 | -0.26 | -0.05 | 0.36  | 0.33  | 0.58  |       | -0.19 | -0.40 | -0.35 | -0.62 | -0.15 | -0.63 |
| 26       | -0.72 | -0.20 | -0.13 | -0.69 | -0.39 | -0.54 | -0.51 | 0.25  | -0.37 | -0.13 | -0.18 |       | -1.00 | -0.13 | -1.16 | -0.01 | 0.15  | 0.93  | -0.03 | 0.15  |
| 27       | 0.12  | -1.16 | -0.18 | 0.32  | -0.03 | -0.61 |       | -0.88 | -0.01 | -0.22 | -0.33 | 0.48  | -0.14 | -0.05 | 1.28  | -0.01 | 0.60  | -0.51 | 0.37  | -0.88 |
| 28       | -0.37 | -0.79 | -0.21 | -0.80 |       | -0.27 | -1.43 | 0.44  | -0.12 | -0.91 | 0.19  | -0.30 | 0.03  | -0.45 | -1.01 | -0.51 | 0.62  | 0.65  | -0.07 | -0.66 |
| 29       | 0.06  | -0.03 | -0.05 | -0.66 | 1.46  | -0.41 | -0.38 | -1.04 | -1.23 | -0.45 | -0.30 | -0.26 | -0.48 | -0.97 | -0.55 | -0.41 | -0.27 |       | 1.04  | 0.66  |
| 30       | -0.34 | -0.08 |       | -0.30 | 0.18  | 1.20  | 1.22  | 2.07  | 0.02  | 0.07  | -0.68 | 0.19  | 0.43  | 0.26  | -0.33 | 1.01  | -0.95 | 0.37  | 0.25  | 0.35  |
| 31       | -1.18 | 0.17  | -0.30 |       | -0.15 | -0.44 | -0.70 | -0.62 | -0.04 | -0.59 | -0.71 | 0.49  | -0.35 | -0.12 | 0.79  | 0.03  | -0.14 | 0.14  | 0.67  | 0.18  |
| 32       | -2.01 | -0.43 | -0.49 | -1.85 | -0.52 | 0.02  | -0.74 | -1.60 | -0.24 | -1.71 | -1.26 | -0.54 | -1.75 | -0.41 | -0.69 | -1.39 | 0.53  | -0.46 | -0.35 |       |
| 33       | -0.48 | -0.84 |       | 0.56  | -0.34 | -0.12 | -0.67 | -0.32 | -0.68 | -2.04 | -0.41 | 0.12  | -1.15 | -1.65 | -1.11 | -0.72 | -0.62 | -0.37 | -1.41 | -0.96 |
| 34       | 0.30  | -0.64 | -0.95 | -0.04 | 1.13  | 0.10  | -0.41 | -1.39 | -0.48 | 0.05  | 0.04  | 1.30  |       | 0.25  | -0.35 | -0.85 | -0.03 | 0.06  | -1.25 | 0.56  |

|    |       |       |       |       |       |       |       |       |       |       |       |       |       |       |       |       |       |       |       |       |
|----|-------|-------|-------|-------|-------|-------|-------|-------|-------|-------|-------|-------|-------|-------|-------|-------|-------|-------|-------|-------|
| 35 | 0.08  | 0.58  | -0.07 | -0.21 | 0.04  | -0.67 | 0.19  | -0.32 | 0.83  | 0.01  | 0.00  | -1.08 | -0.50 | -0.62 | -0.17 | 0.68  |       | -1.12 | -0.13 | -0.08 |
| 36 | -1.19 | -0.57 | -0.88 | -1.20 | 0.03  | -1.94 | -1.12 |       | -1.57 | -0.93 | -0.38 | -0.68 | -0.63 | -1.08 | -0.45 | -1.43 | -0.97 | 0.11  | 0.68  | -0.96 |
| 37 | -0.03 | 0.93  | 0.41  |       | 0.23  | 0.34  | 0.13  | -0.88 | 0.11  | 0.63  | -0.38 | -0.99 | -0.84 | -0.20 | -0.41 | 1.17  | -1.36 | -0.02 | -0.83 | -0.62 |
| 38 | 0.31  | -0.13 |       | 0.62  | -0.39 | 0.27  | -0.17 | -0.21 | -0.37 | -0.07 | 0.23  | -0.14 | 0.66  | 1.10  | 0.76  | -0.67 | 0.23  | 1.36  | 0.08  | 0.67  |
| 39 | -0.52 | 0.19  | 0.25  | 1.14  | -0.26 | 0.03  | -0.20 | -0.56 | 0.48  | 0.15  | -0.57 | -0.33 | -0.86 | -0.12 | -0.14 |       | -0.27 | 0.72  | 0.24  | 0.01  |
| 40 | -0.29 | -0.32 | 0.23  | 1.14  | 0.16  | 1.19  | -0.35 | -1.28 | -0.87 | -0.52 | -0.20 | -0.10 | 0.34  | -0.90 | -0.58 | -0.11 | 0.06  | 0.54  | -0.10 |       |
| 41 | -0.19 | -1.36 | -0.44 | -0.03 | -0.29 | -0.80 | 0.10  | -0.66 | -0.80 | -0.83 | -0.11 | -0.55 | 0.84  | 0.98  |       | -0.41 | -1.32 | 0.19  | -0.19 | -0.13 |
| 42 | 0.14  | -0.46 | -0.70 | -0.29 | -0.10 | 0.49  | 1.27  | -0.09 |       | -0.09 | -0.65 | 0.21  | -0.50 | 0.38  | 0.72  | 0.08  | -0.22 | -0.10 | 1.05  | 0.10  |
| 43 | 0.60  | -0.37 | 0.50  | -0.03 | 0.52  | -0.77 | -0.18 | -0.94 | 0.27  | 0.14  | 0.33  | 0.14  | -0.66 |       | 0.00  | 0.36  | -0.29 | -0.14 | -0.02 | 0.16  |
| 44 | -0.62 | -0.84 | -0.87 | -2.13 | 0.11  | -1.09 | -0.36 | -0.19 | -0.77 | 0.34  | -0.39 | -0.74 | -0.40 | -1.90 | -0.47 | -0.94 | -0.52 |       | 0.64  | -0.05 |
| 45 | 0.02  | -0.42 | -0.13 | -1.77 | -0.60 | -0.69 | -0.29 | -0.39 | -0.43 | -1.11 | 0.18  | -0.51 | -1.23 | -1.06 | -1.38 | -1.06 | -1.12 |       | -0.89 | -1.17 |
| 46 | 0.25  | -0.06 | 1.85  | -0.06 | -0.41 | 0.50  | -0.06 |       | 0.83  | 0.58  | 0.09  | 0.02  | -0.09 | -0.06 | 0.78  | -0.73 | -1.57 | 1.70  | -0.06 | -0.06 |
| 47 | 0.29  | -0.32 |       | 0.03  | 0.51  | -0.33 | 0.66  | 0.03  | -0.47 | -0.03 | 0.15  | 1.70  | 0.48  | -0.13 | 1.48  | 0.01  | -0.13 | 0.27  | -0.36 | 0.15  |
| 48 | -0.01 | 0.63  | -0.89 | 1.28  | -0.49 |       | 0.76  | -0.35 | -0.38 | 0.01  | -0.54 | 0.21  | 0.30  | -0.61 | 0.14  | 0.36  | -0.56 | -1.13 | 0.38  | 0.99  |
| 49 | -0.75 | 0.07  | 0.57  |       | -0.54 | 0.14  | -0.40 | 0.72  | 0.10  | -0.28 | -0.08 | 0.29  | 0.33  | 1.20  | 0.16  | -0.01 | 0.04  | -0.59 | 0.05  | 0.78  |
| 50 | -0.39 | -0.36 | -0.57 | 0.13  | 0.25  | -1.19 | 0.79  | 0.75  | 0.33  | -0.63 | -0.35 | -0.04 | 0.48  | -0.64 | -0.33 | -0.24 |       | 0.82  | 0.02  | 0.40  |
| 51 | -0.51 |       | -0.74 | -0.10 | -0.74 | -0.50 | -0.10 | 0.74  | -0.01 | 0.01  | -0.03 | -0.82 | 0.25  | -0.19 | -0.50 | -1.04 | -0.53 | -0.14 | -0.45 | -0.04 |
| 52 | -0.24 | 0.10  | 0.14  | -0.34 | -0.21 | -0.14 | -0.18 | 0.64  | 0.73  |       | -0.99 | 0.05  | 1.11  | -0.07 | 0.52  | -0.11 | 1.59  | 0.19  | -0.42 | -0.18 |
| 53 | -0.33 | -0.08 | 1.32  | -0.09 | 0.79  | 0.38  | 0.17  | -0.94 | 1.71  |       | 0.21  | -0.69 | 0.70  | 0.39  | 0.21  | -0.17 | 0.37  | -0.03 | 0.23  | 0.47  |
| 54 | 0.38  | 0.39  |       | 0.20  | 0.32  | -0.09 | -0.02 | 0.65  | -0.85 | -0.63 | -0.10 | -0.07 | -0.20 | 0.55  | 0.01  | -0.59 | -0.32 | -0.10 | -1.31 | 0.88  |
| 55 | -0.54 | -0.53 | -0.30 | -0.80 | -0.41 | -0.51 | 0.49  |       | -0.49 | 0.14  | -0.39 | 1.29  | 0.27  | -0.25 | 0.60  | 0.77  | 0.92  | 0.36  | -0.67 | -0.54 |
| 56 | 0.19  | -0.22 | 0.87  | 3.94  | -0.34 | 1.78  | 0.19  | 0.28  | -0.35 |       | 0.26  | 0.13  | -0.03 | 0.10  | -0.18 | 1.20  | -0.66 | 0.87  | -0.21 | -0.87 |
| 57 | -0.19 | 0.09  |       | 0.75  | -1.49 | 0.29  | 1.25  | -0.71 | -0.01 | 0.37  | -0.43 | 0.46  | 0.38  | 0.04  | -0.67 | -0.24 | -0.24 | -0.91 | -0.52 | -0.23 |
| 58 | 0.21  | 1.10  | -1.05 | -0.45 | 1.36  | 1.66  | -0.56 | 1.84  | -0.34 | 0.36  | 0.58  | 0.81  | 0.38  | -0.44 | 0.42  | -0.37 |       | 0.17  | -0.13 | -0.22 |
| 59 |       | 0.62  | -0.54 | -0.80 | 1.94  | 0.93  | 1.60  | 1.95  | -0.05 | 1.21  | 0.67  | 0.40  | 1.19  | -0.65 | -0.95 | 1.74  | 1.05  | 0.65  | 0.48  | 0.45  |
| 60 | -0.65 | 1.23  | 0.18  | -0.18 | -0.23 |       | 0.40  | 0.12  | -0.01 | -0.29 | -0.17 | -0.61 | -0.22 | -0.26 | -1.12 | 1.49  | 0.16  | 0.53  | 0.06  | -0.48 |
| 61 | -0.28 | -0.05 | 0.11  | -1.13 | 1.19  | -0.53 | 0.31  | -1.36 | -0.63 | 1.24  | -1.60 | -1.55 | 0.48  |       | 0.23  | 0.18  | -2.02 | -0.65 | -0.16 | 0.81  |
| 62 | 0.24  | -0.63 | -0.09 |       | 0.28  | -0.70 | 0.66  | -1.22 | 0.35  | -0.41 | -0.18 | 1.52  | 0.58  | -0.02 | 0.69  | -0.18 | 0.82  | 0.67  | -0.86 | -0.74 |
| 63 | -0.21 | 0.52  | -0.26 |       | -0.15 | -0.39 | 0.23  | -0.42 | -0.11 | 1.09  | -0.16 | 0.27  | 1.00  | 0.40  | -0.08 | -1.10 | 1.19  | -0.29 | -0.59 | 0.29  |
| 64 | 0.11  | 0.00  | -0.63 | -0.52 | 0.07  | 0.46  | 0.04  | -0.22 | -0.28 | 0.10  | 0.64  | 0.23  | -0.31 | -0.95 | -0.32 | -0.20 | -0.02 | -1.58 | 0.17  |       |
| 65 | 0.24  | -0.56 | 0.11  | -0.40 | -1.29 | -0.07 | -0.26 | -1.47 | -0.27 | -0.13 | -0.51 | 0.30  | -0.84 | -1.04 | -0.26 |       | -1.20 | -0.35 | -0.37 | -0.44 |
| 66 |       | -0.20 | -0.06 | -0.04 | -1.58 | -0.45 | -1.08 | 0.42  | -1.68 | 0.10  | -0.23 | -0.57 | -0.30 | 0.31  | -0.43 | -0.69 | -0.74 | -0.25 | 0.18  | -0.41 |
| 67 | -0.48 | -0.65 | -0.80 | -0.64 | 1.08  | -2.77 | -0.24 | 0.26  | -0.10 | -0.12 |       | 0.21  | 0.24  | -1.02 | 0.30  | -0.74 | -1.00 | -0.12 | -0.88 | 0.03  |
| 68 | 2.65  | 1.56  | 1.36  | 0.83  | 1.41  | 1.44  | 0.85  | 0.81  | 0.29  | 3.47  | 0.92  | 2.11  | 0.28  | 1.01  |       | 1.26  | 0.83  | 0.68  | 0.69  | -0.01 |
| 69 | 0.41  | -1.56 |       | -0.02 | -0.39 | -1.57 | -0.18 | -1.02 | -0.99 | -0.84 | -1.23 | -0.46 | -0.60 | 0.96  | -0.20 | -0.65 | -0.67 | -0.52 | -0.94 | -0.75 |
| 70 | 0.47  | -0.09 | 0.36  | 0.50  | -0.02 | -0.21 | 0.31  | -1.42 | -0.05 | -0.27 | -0.96 | -0.22 | -0.28 |       | -0.90 | 0.18  | 0.99  | -0.52 | -0.56 | -1.39 |
| 71 | -0.50 | -0.08 | 0.30  | 0.38  | -0.56 | -1.01 | 0.13  | -0.56 | -0.87 | -0.12 | -0.10 | 0.31  | 0.58  | -0.31 | 0.38  | -0.33 | 0.29  | -2.04 | 0.71  |       |
| 72 | 0.46  | 0.44  | 0.43  | -1.16 | -0.30 | -2.42 | 0.76  | 0.56  | -0.14 | -0.02 |       | -0.36 | -0.42 | -0.36 | -0.84 | -1.02 | 0.49  | -0.37 | 0.95  | 1.37  |
| 73 | -0.68 | -0.65 | 0.05  | 0.33  | 0.18  | -1.39 | 0.48  | -0.64 | -0.07 | -0.09 | 0.18  | 0.11  | 0.46  | 0.61  |       | -0.34 | -0.23 | 0.25  | -0.36 | -0.46 |

|     |       |       |       |       |       |       |       |       |       |       |       |       |       |       |       |       |       |       |       |       |
|-----|-------|-------|-------|-------|-------|-------|-------|-------|-------|-------|-------|-------|-------|-------|-------|-------|-------|-------|-------|-------|
| 74  | 0.34  | 1.03  | 0.22  | 1.02  | -0.79 | 0.53  | 0.20  | 0.78  | -0.41 | -0.07 | 0.27  | 0.56  | -0.01 | -0.65 | 0.31  | 0.35  |       | -0.66 | 0.88  | -1.37 |
| 75  | -0.20 |       | -0.54 | -0.65 | -0.30 |       |       |       | -0.51 | -1.39 | -0.23 | -0.35 | -0.62 | -0.94 | -0.04 |       | -1.23 | -0.18 | -0.25 | 0.17  |
| 76  | -0.13 | -0.81 | -0.05 |       | -1.16 | 0.86  | -0.16 | -1.83 | -0.21 | -0.71 | -0.61 | -0.97 | 0.15  | 0.82  | -0.19 | -0.92 | -0.56 | -0.08 | -0.06 | -0.86 |
| 77  | -0.01 | 0.32  | -0.90 | -0.08 | 0.92  |       | 0.97  | -0.45 | -1.24 | -0.34 | 0.00  | -0.09 | -0.26 | -0.25 | -0.78 | 0.28  | -0.59 | -0.79 | -0.44 | 0.44  |
| 78  | -0.06 | -0.33 | -0.21 | -0.25 |       | 1.59  | -0.03 | 0.76  | -0.68 | 0.36  | 0.12  | -0.82 | 0.96  | -0.99 | -0.47 | -0.04 | 0.32  | 0.52  | 0.27  | 0.34  |
| 79  | 0.05  | -0.25 | 0.01  | 0.06  | 0.24  | -0.10 | 0.09  | 0.00  | -0.34 |       | -0.28 | -0.26 | 0.24  | -0.48 | -0.90 | 0.83  | 0.22  | 0.94  | 0.61  | 0.35  |
| 80  | 0.08  |       | 0.51  | -0.81 | 0.36  | -0.20 | -0.12 | 0.68  | 1.25  | -0.85 | -0.25 | 0.35  | 0.49  | -0.94 | -0.31 | -0.09 | -0.19 | 0.71  | -0.17 | -0.22 |
| 81  | 0.17  | -0.93 | 0.41  | -1.00 | 0.47  | 0.84  | -0.71 | -0.12 | -0.46 | 0.34  | -0.16 | 0.32  | -0.42 | -0.71 | -0.16 | -0.70 | 0.31  |       | -0.29 | 0.55  |
| 82  | 0.18  | 0.12  | 0.08  | 0.06  |       | 0.28  | 0.73  | -0.70 | -0.47 | -0.42 | 0.16  | 0.01  | -0.01 | -0.41 | 0.07  | -0.46 | 0.51  | 0.28  | -0.13 | -0.30 |
| 83  |       | 0.30  | -0.13 | 0.11  | -0.31 | -0.22 | -0.74 | 0.41  | 0.58  | -0.25 | -0.04 | -0.13 | -0.87 | -0.94 | -0.10 | 0.79  | 0.11  | 0.22  | -0.29 | -0.75 |
| 84  | 0.27  | -0.20 | -0.40 | -0.67 | -0.39 | -0.76 | -0.21 |       | -0.16 | 0.12  | 0.03  | -0.53 | 0.89  | -0.12 | -0.30 | -0.10 | 0.31  | -0.25 | -0.34 | -0.50 |
| 85  | 1.11  | 0.01  | 0.41  | -0.17 | -0.14 | -0.73 | 0.29  | 0.01  | 0.30  | -0.90 | -0.88 |       | 0.15  | -0.63 | 0.44  | -0.46 | -0.52 | 0.03  | -0.86 | -0.78 |
| 86  | -0.98 | 0.04  | -0.41 | -0.07 | -0.26 | 0.10  | -0.72 | 0.74  | -0.10 | 0.22  | -0.60 |       | 0.60  | -0.43 | 0.43  | 0.09  | 0.02  | -1.40 | -0.61 | 0.44  |
| 87  | 0.24  | -0.28 | 0.30  | -0.49 | 0.20  | -0.32 | -0.18 | 0.24  | -0.18 | -0.03 | 0.04  | -0.71 | 0.34  | -0.47 | -0.94 | 0.32  |       | -0.04 | -0.03 | -0.47 |
| 88  | 0.91  | 0.14  | -0.43 | -0.50 | -0.09 | 0.98  | -1.42 | -0.62 |       | -0.19 | -0.16 | -0.45 | 0.16  | -0.15 | -0.29 | -0.38 | -0.25 | -0.52 | 0.92  | 0.91  |
| 89  | -0.51 | -0.67 | -1.37 | 0.71  | -0.55 | -0.26 | -0.56 | -0.93 | 0.16  | 0.25  | -0.17 | -0.23 | -0.71 | -1.14 | 0.52  |       | -0.45 | -0.27 | -0.24 | -0.16 |
| 90  | -0.68 | -0.30 | 0.22  | -0.98 |       | -0.30 | 0.26  | -0.44 | -0.54 | 0.09  | 0.07  | 0.50  | 0.35  | -0.85 | 0.12  | -1.08 | 0.92  | 0.91  | -0.24 | -0.29 |
| 91  | 1.15  | 0.61  | -0.01 |       | 0.03  | 0.39  | -0.77 | 0.29  | -0.08 | 0.05  | -1.02 | 0.70  | -0.03 | -0.01 | 0.65  | -0.76 | -0.21 | 0.07  | 2.26  | 0.24  |
| 92  | 0.20  | 0.32  |       | 0.12  | -0.33 | -0.12 | -0.18 | 0.10  | -0.34 | 0.01  | 0.35  | 0.06  | 0.77  | -1.03 | 1.56  | -0.05 | -0.59 | -0.50 | -0.10 | 0.68  |
| 93  | -0.51 | -0.68 | -0.15 | 0.49  | 0.34  | 0.90  | -0.25 |       | 0.54  | 0.24  | 0.13  | -0.58 | -0.21 | 0.18  | 1.03  | 0.67  | 0.64  | 1.08  | -0.40 | -0.23 |
| 94  | -0.06 | -0.21 | 0.57  | 0.03  | 0.10  | -0.06 |       | -0.11 | -0.02 | -0.23 | -0.06 | 0.85  | -0.46 | 0.22  | -0.99 | 0.73  | -0.66 | -0.06 | -0.06 | 0.80  |
| 95  | -0.26 | 0.08  | -0.05 | 1.14  | 0.57  | 1.21  |       | -0.89 | 0.62  | -0.87 | 0.40  | 0.22  | -0.23 | 0.33  | 0.42  | -0.65 | 0.76  | -0.62 | 1.07  | 0.12  |
| 96  | 3.43  | 3.32  | 2.32  | 2.57  | -0.05 | 1.65  | 2.71  | 1.31  | 2.94  | 4.33  | 3.79  | 3.09  | 0.62  | 3.34  | 3.16  | 2.69  | 3.59  | 1.97  | 4.30  |       |
| 97  | -0.46 | 0.43  | 0.00  | -0.16 | 0.77  | -0.58 | -0.48 | -0.09 | -0.46 | 0.69  | 0.27  | 0.06  | 0.79  | 0.19  |       | -0.79 | 0.06  | -0.47 | -0.78 | -0.19 |
| 98  | -0.13 | -0.55 | 0.60  |       | 0.26  | -0.39 | 0.56  | -0.15 | -0.27 | 0.63  | -0.08 | 0.19  | -0.02 | 0.24  | -1.15 | 0.35  | 0.13  | 0.75  | 0.36  | 0.10  |
| 99  | 0.14  | 0.75  | 4.33  | 0.35  | 0.13  | 0.41  | 0.36  | -0.73 | -0.81 | -0.16 | 0.25  | 0.42  | 0.16  |       | 0.61  | 0.74  | 0.51  | 0.50  | 2.02  | 0.33  |
| 100 | -0.17 | -0.86 | -0.65 | 0.86  | 0.07  | -0.91 | -0.06 | -0.16 | -0.74 | 0.41  | 0.37  | -0.56 | 0.27  | -0.07 | -0.19 | -0.83 | -0.65 | -0.72 | -0.37 | -0.17 |
| 101 | 1.28  | 0.47  | -0.56 | 0.56  | 0.85  | 0.74  | -0.08 |       |       | 0.29  | -0.21 | 1.28  | -0.25 | 0.95  | 0.59  | 0.48  | 1.25  | -0.34 | -0.10 | 0.45  |
| 102 | -0.81 | 0.15  | -0.25 | -0.18 | -0.23 | -0.21 | -0.44 | -0.39 | 0.19  | -0.58 | 1.11  | 0.44  | 1.90  | 0.01  |       | -0.63 | -0.12 | 0.55  | -0.46 | -0.40 |
| 103 | 0.07  | -0.02 | 0.27  | -0.20 | 0.02  | -0.84 | 0.36  | 1.39  | -1.02 | 0.24  | -0.83 | 0.12  | 0.27  | 0.52  | -1.65 | -0.03 | -0.47 |       | -0.54 | -0.48 |
| 104 | -0.28 | 0.47  | 0.62  | -0.11 | 0.91  | 0.35  | -0.05 | 0.06  |       | 0.18  | -0.05 | -0.06 | -0.76 | 0.02  | -0.07 | -0.57 | -0.93 | 0.89  | 0.32  | -0.46 |
| 105 | 0.17  | -0.62 |       | 0.08  | -0.11 | 0.57  | 0.42  | -0.23 | -0.84 | 0.02  | 0.05  | 0.40  | -0.57 | 0.48  | -0.41 | -0.58 | -0.31 | 0.07  | 0.36  | 0.03  |
| 106 | 0.13  | 0.27  | -0.11 | -0.67 | -0.58 | -0.15 | -0.78 | -0.03 | 0.15  | 0.33  | -0.23 | -0.46 | -0.50 | 0.64  | 0.03  |       | 0.32  | 0.01  | 0.42  | 0.88  |
| 107 | 0.11  | 0.27  | 0.19  |       | 0.71  | 0.72  | -0.22 | 0.36  | -0.20 | 0.19  | -0.11 | -0.03 | -0.08 | 0.24  | -0.28 | -0.15 | 0.33  | 0.31  | -0.14 | -0.10 |
| 108 | -0.32 | 0.08  |       | -0.18 | 0.42  | 0.18  | 0.90  | 0.13  | -0.05 | 1.14  | -0.45 | -0.13 | 0.19  | 0.67  | 0.61  | -0.62 | 0.22  | 1.13  | 0.05  | 0.47  |
| 109 | -0.19 | -0.03 | 0.04  | -0.30 | 0.18  | 0.34  | -0.57 | -0.36 | 0.09  | -0.24 | 0.37  | 0.37  | -1.09 | -0.15 | -0.42 | -0.01 | -0.13 |       | 1.38  | -0.14 |
| 110 | -0.03 | 0.22  | 0.04  | 0.82  | 0.25  | -0.26 | -0.62 | 0.06  | 1.16  | -0.92 | -0.56 | 0.17  |       | 0.00  | -0.02 | -0.22 | -0.68 | -0.45 | 0.41  | 0.04  |
| 111 | 0.48  | -0.34 | 0.19  | -0.45 | -0.14 | 0.50  | -0.15 | -0.04 | 0.05  | 0.02  |       | -1.06 | 0.50  | -0.16 | 0.06  | 0.19  | -0.28 | 0.27  | 0.44  | 0.11  |
| 112 | 0.88  | 0.30  | -0.11 | -0.74 | -0.27 | -0.03 | 0.17  | -0.22 | -0.70 | -0.87 | -0.55 | -1.01 | 0.07  | 0.20  | 0.14  | 0.20  | 0.57  |       | -0.22 | 0.53  |

|     |       |       |       |       |       |       |       |       |       |       |       |       |       |       |       |       |       |       |       |       |
|-----|-------|-------|-------|-------|-------|-------|-------|-------|-------|-------|-------|-------|-------|-------|-------|-------|-------|-------|-------|-------|
| 113 | -1.05 | 0.00  | -0.18 | 1.30  | 0.13  | -0.46 | 0.24  | -0.91 | -0.91 |       | -0.52 | 0.12  | 0.05  | -0.81 | 0.64  | -0.72 | -0.26 | 0.03  | -0.37 | 0.03  |
| 114 | -0.43 | 0.15  | -0.26 | -0.49 | -0.24 | -0.15 | 0.19  | -0.49 | -0.11 | -0.27 | 0.56  | -0.73 | -1.39 | -0.12 | 0.93  | -0.47 | 0.01  |       | 0.39  | 0.24  |
| 115 | 0.02  | -0.11 | 0.27  | -0.61 | 1.11  |       | 0.51  | 0.22  | 0.59  | -0.22 | 0.67  | -0.45 | -0.27 | -0.36 | 0.08  | -0.61 | 0.38  | 0.01  | -0.05 | -0.68 |
| 116 | 0.16  | 1.30  | -0.37 | -0.64 | -0.78 | 0.16  | 0.29  | -0.52 | 0.19  | 0.42  | 0.51  |       | -0.56 | -0.36 | -0.25 | -0.33 | 0.58  | -0.36 | -0.64 | -0.94 |
| 117 | 1.04  | -0.86 | -0.52 | 0.00  | 0.82  | 0.06  | -0.05 | -0.58 |       | 1.30  | 0.42  | 0.63  | -0.25 | -0.17 | 0.21  | 0.31  | -0.37 | -0.15 | 0.01  | 2.70  |
| 118 | -0.34 |       | 0.05  | -0.92 | -0.16 | -0.20 | 0.61  | -0.37 | -0.04 | -0.67 | 0.15  | 0.78  | -0.34 | 0.11  | 0.54  | -0.21 | 0.22  | -0.15 | 0.04  | 1.47  |
| 119 | -0.04 | 0.58  |       | 0.48  | -0.16 | 0.68  | -0.17 | 0.48  | 0.67  | 0.32  | 0.74  | 0.32  | -0.82 | 0.73  | 1.02  | -0.44 | -0.49 | -0.06 | 0.57  | -0.11 |
| 120 | 0.86  | 0.65  | -0.58 | 0.00  | -0.09 | -0.16 | -0.10 | 0.03  | -0.08 |       | -0.25 | 0.45  | 0.73  | -0.18 | 1.26  | 0.78  | 0.80  | 0.85  | -0.09 | 0.28  |
| 121 | 0.35  | 0.29  | -0.38 | 0.00  | -0.03 | 0.54  | 0.19  | -0.01 | -0.33 | -0.08 | 0.39  | -0.01 |       | -0.09 | -0.33 | 0.37  | 0.39  | -0.04 | 0.40  | 0.19  |
| 122 | -0.32 | -0.58 | -0.17 | 0.34  | 0.06  | -0.33 | -0.10 | 0.23  | -0.34 | -0.13 | -0.09 | 0.34  | 0.07  | -0.61 | -0.53 |       | -0.16 | -0.07 | 1.33  | -0.25 |
| 123 | -0.14 | 0.48  | -0.10 | 0.19  | -0.63 | 0.08  | 0.48  | -0.11 | -0.06 | 0.63  | 1.13  | 0.52  | -0.75 | 0.61  |       | -0.32 | -0.61 | -0.37 | -0.26 | 0.26  |
| 124 | -0.42 | 0.99  | -0.27 | 0.09  | -0.61 | -0.31 | -0.27 | -0.08 | 0.13  | -0.27 | -0.57 | 1.47  | 0.07  | -0.68 | 0.41  | 0.85  |       | 0.10  | -0.08 | -0.29 |
| 125 | 0.26  | -0.21 | 0.93  | -0.65 | 0.72  | -0.18 | -0.27 | -0.05 | -0.10 | -0.59 | -0.11 | 0.05  | -0.05 | -0.56 | 0.08  | 0.28  | -0.38 |       | -0.48 | -0.15 |
| 126 | -0.63 | 0.04  |       | -0.05 | -0.55 | -0.43 | -0.18 | -0.92 | 0.80  | -0.76 | -1.41 | 0.08  | -1.38 | 0.41  | -0.47 | -0.20 | 0.48  | 0.37  | 1.15  | -0.05 |
| 127 | -0.43 | 0.34  | -1.15 | -0.35 | -0.32 | -0.15 | 0.05  | -0.52 | -0.20 | -0.41 | 0.09  | 0.05  | 0.37  | -0.94 | 0.47  | 0.52  |       | -1.06 | -0.66 | -0.16 |
| 128 | -0.31 | 0.64  | -0.16 | -0.59 | 0.21  | -0.65 | 0.11  | 0.07  |       | -0.29 | -0.64 | -0.23 | -0.22 | 0.57  | 0.00  | -0.43 | -0.04 | -0.47 | 0.45  | 0.06  |
| 129 | -0.26 | -0.13 | -0.23 | -0.24 | -0.21 | -0.02 | 0.49  | -1.20 | 0.32  | -0.13 | -0.55 | 0.34  | -0.32 |       | 0.29  | 0.30  | -0.42 | 0.40  | -0.12 | 0.43  |
| 130 |       | -0.32 | 0.24  | 1.00  | 0.49  | 0.27  | 1.18  | -0.40 | -0.74 | -0.20 | -0.04 | -0.34 | 0.15  | 0.48  | 0.12  | -0.49 | -0.19 | 0.47  | 0.72  | 0.07  |
| 131 | -0.06 | -0.80 | 0.38  | 0.11  | 0.71  | 0.12  | 0.24  | -0.36 | 0.16  | -0.35 | -0.06 | 0.06  | -0.34 |       | -0.30 | -0.48 | 0.20  | -0.18 | 0.06  | 1.06  |
| 132 | -0.38 | -0.12 |       | -0.32 | 0.01  | 0.53  | -0.08 | -0.63 | 1.10  | -0.48 | 0.55  | 0.71  | -0.05 | -0.83 | 0.05  | -0.30 | -0.33 | 0.41  | 0.31  | 0.18  |
| 133 | -0.03 | 0.38  | -0.46 | -0.09 | -0.09 | -0.45 | 0.32  | 0.26  | -0.64 |       | 0.59  | 0.12  | -0.71 | -0.59 | 0.25  | 0.41  | 0.18  | -0.38 | 0.68  | 0.67  |
| 134 |       | -0.57 | 0.75  | 0.78  | -0.42 | 0.26  | 0.09  | -0.30 | -0.34 | 0.02  | -0.58 | -0.15 | -0.34 | -0.44 | -0.14 | -0.09 | 0.31  | -0.37 | 0.40  | -0.36 |
| 135 | 0.25  | 0.27  | 0.20  | 0.30  | 0.55  | 0.11  | -0.51 | 0.13  | 0.37  | -0.17 | -0.33 | 0.05  | 0.38  | 0.30  |       | 0.17  | -0.18 | -0.28 | 0.73  | 1.24  |
| 136 | 0.37  | 0.23  | -0.57 | -1.10 | -0.08 | 0.57  | 0.50  | 1.64  | -0.33 | 0.22  | 0.79  | 0.58  | -0.07 | -1.32 | 0.20  |       | 0.80  | 0.04  | -0.44 | -0.02 |
| 137 | -0.18 | 0.43  | 0.29  | -0.18 | 0.19  | 1.14  | -0.16 | 0.93  | -0.30 | 0.13  | -0.24 | -0.65 | 0.44  | -0.25 | 0.11  | -0.24 | 0.69  | -0.21 | 0.21  |       |
| 138 | 0.22  | -0.04 | 0.12  | -0.57 | 0.04  |       | -0.21 | -0.24 | 0.44  | 0.63  | 0.32  | 0.56  | -0.06 | 0.08  | 0.09  | 0.02  | 0.34  | -0.11 | 0.39  | -0.26 |
| 139 | 0.61  | -0.23 | -0.34 | -0.58 | 0.40  | 0.28  | 0.83  |       | -0.08 | -0.19 | -0.06 | 0.34  | 0.35  | 0.09  | 0.51  | 0.18  | -0.24 | -0.16 | 0.11  | 0.56  |
| 140 | 0.48  | -0.39 | -0.15 | 0.40  | -0.36 | -0.35 | -0.82 | 0.01  | 0.67  | 0.80  | -0.50 | 0.10  |       | 0.34  | -0.24 | 1.07  | -0.20 | 0.10  | -0.03 | 0.56  |
| 141 | -0.60 | -0.48 | -0.76 | -0.56 |       | -0.44 | -0.41 | 0.07  | -0.16 | -0.27 | 0.42  | -0.45 | -0.14 | -0.48 | 0.53  | -0.57 | -0.14 | -0.07 | -0.45 | -0.03 |
| 142 | -0.07 | -0.06 | 0.66  | -0.06 | 0.37  | -0.84 | -0.06 |       | 0.68  | 0.76  | 0.53  | -0.03 | 0.50  | -0.06 | 0.50  | 0.81  | -0.16 | 0.14  | -0.06 | -0.06 |
| 143 | 0.12  | 1.54  | 0.20  |       | 0.66  | -0.35 | 0.17  | 0.02  | 0.45  | 0.35  | 0.34  | 0.56  | 0.12  | 0.58  | 0.47  | -0.23 | 0.37  | 0.32  | -0.70 | -0.43 |
| 144 | -1.38 | 1.17  | -0.96 | -1.21 | 0.07  | -0.76 | -0.37 | -0.25 | 0.41  | 1.28  | -0.09 | 0.40  | -0.67 | 0.57  | -0.45 | 0.04  |       | 1.20  | 0.24  | -0.62 |
| 145 | -0.07 | -0.30 | -0.47 | 1.89  | 0.17  | 1.43  | 0.43  | 0.18  | 0.08  | 0.20  | 0.81  | -0.21 | 1.59  | 0.12  | 0.05  |       | -0.33 | -0.54 | 0.74  | -0.17 |
| 146 |       | -0.49 | 0.00  | -0.68 | -0.06 | -0.60 | -0.29 | -0.70 | -0.24 | 0.60  | -0.01 | -0.22 | 0.48  | -0.82 | -0.23 | -0.07 | 0.24  | 0.49  | -0.46 | -0.50 |
| 147 | -0.03 | -0.27 | 0.18  | -0.20 | 0.75  | -0.33 | -0.31 | 0.30  |       | -0.65 | 1.06  | -0.31 | -0.60 | -0.11 | -0.27 | -0.03 | -0.30 | 0.10  | 0.48  | 0.38  |
| 148 | -0.32 | 0.23  | -0.37 | -0.19 | 0.32  | -0.13 | -0.73 | 0.22  | -0.19 | -0.95 | -0.11 | 1.48  | 0.79  | 0.01  | 0.39  | 1.18  |       | -0.49 | -0.81 | 0.04  |
| 149 | -0.56 | 1.30  | 0.25  | -0.56 | 0.45  | 0.01  | -0.19 | 0.82  | -0.26 | 1.04  | 0.49  | -0.07 | -0.05 | -0.40 |       | 0.26  | 0.54  | 0.99  | -0.77 | 0.16  |
| 150 | -0.50 | 0.83  | -0.56 | 0.60  | -0.37 | 0.72  | -0.10 | -0.41 | 0.24  | 0.18  | -0.42 | 0.57  | 0.38  |       | 0.03  | -0.11 | 0.08  | 0.36  | -0.72 | -0.44 |
| 151 | 0.24  | -0.91 | -0.72 | 0.60  | -1.15 | -0.24 | -0.44 | 0.03  | -0.49 | 0.75  | 0.12  | -0.98 | -0.85 | 0.70  |       | -0.29 | -0.46 | 0.41  | -0.30 | -0.03 |

|     |       |       |       |       |       |       |       |       |       |       |       |       |       |       |       |       |       |       |       |       |
|-----|-------|-------|-------|-------|-------|-------|-------|-------|-------|-------|-------|-------|-------|-------|-------|-------|-------|-------|-------|-------|
| 152 | 0.46  | 1.32  | 0.05  | -0.13 | -0.14 | -0.44 | -0.16 | 0.41  | 1.20  | 0.44  | 0.36  | -0.01 | 1.53  | 0.51  | 1.20  | 0.36  | -0.53 |       | 1.05  | 0.01  |
| 153 | 1.22  | 0.31  | -0.03 |       | 0.06  | 0.48  | 0.04  | 1.21  | 0.73  | 0.43  | 0.59  | 0.00  | -0.30 | 0.76  | 0.62  | 0.22  | -0.34 | 0.82  | 0.72  | 0.42  |
| 154 | 0.21  | -0.30 |       | 0.19  | -0.42 | 0.28  | 0.55  | 0.08  | 0.19  | 0.30  | 0.15  | 1.37  | 1.04  | 0.11  | 0.06  | 0.28  | -0.14 | 0.53  | -0.78 | -0.21 |
| 155 |       | 0.08  | 0.17  | 0.87  | -0.01 | -0.35 | 0.67  | 0.27  | 0.15  | 0.34  | 0.67  | 0.21  | 0.29  | 0.39  | 0.01  | 0.06  | 1.02  | 0.05  | 1.03  | 0.90  |
| 156 | -0.03 | 0.50  | -0.22 | -0.64 |       | 0.09  | 0.35  | 1.06  | 0.35  | 1.31  | 0.15  | -0.27 | 0.34  | 0.15  | 0.97  | -0.06 | -0.16 | -0.56 | 1.34  | 0.61  |
| 157 | -0.39 | 0.88  | -0.33 | -0.08 | -0.03 | -0.64 | 0.19  | 0.48  | 0.51  | 0.04  | 0.11  | 0.01  | -0.04 | -0.31 | 0.82  | 0.40  | -0.31 | -0.05 | 0.04  |       |
| 158 | 0.08  | -0.37 | 0.05  | 0.36  | -0.70 | 0.35  | 0.86  | 0.70  | 0.26  | -0.20 | -0.08 | -0.63 | -0.01 | 0.24  | 0.00  | 0.13  |       | 0.00  | -0.10 | -0.06 |
| 159 | 0.46  | 0.66  | -0.41 | -0.28 | -0.05 | 0.07  | -0.07 | -0.05 | -0.29 |       | 0.56  | -0.40 | 0.41  | -0.02 | 0.87  | -0.71 | 0.00  | 0.09  | 0.54  | 0.11  |
| 160 | -0.25 | -0.14 | -0.33 | 0.42  | 0.89  | 0.06  | 0.29  | 0.28  | 0.51  | 0.59  | -0.24 | 0.54  | 0.16  | 0.34  | -0.06 | 0.30  | 0.17  |       | -0.07 | 0.02  |
| 161 | -0.65 | -0.16 | -0.85 | -0.26 | -0.27 | 0.17  | 0.00  | -0.35 | 0.34  | 0.55  | -0.13 | -0.32 | -0.64 | 0.25  |       | 0.04  | -0.70 | -1.07 | -0.54 | 0.34  |
| 162 | -0.20 | -0.06 | -0.04 |       | 0.29  | 0.03  | -0.23 | -0.12 | 1.16  | 0.15  | -0.57 | 0.41  | 0.90  | 0.07  | -0.01 | -0.18 | 0.66  | 0.48  | -0.29 | -0.65 |
| 163 | -0.35 | -0.44 | -1.19 | 0.01  | 1.22  | 0.27  | 0.13  |       | 0.08  | -0.16 | 0.01  | 0.40  | -0.34 | 0.19  | 0.33  | 0.20  | 0.15  | -0.44 | -0.05 | 0.32  |
| 164 | -0.08 | -0.10 | 0.28  | -0.64 | -0.61 | -0.12 | -0.81 | 0.12  | 0.18  | -0.69 | -0.70 | 0.30  | -0.21 | -0.14 |       | 0.59  | -1.01 | -0.10 | 0.54  | -0.30 |
| 165 | -0.49 | -0.73 | 1.04  | 0.73  | -0.55 | -0.20 | -0.39 | -0.09 | -0.65 | 0.05  | 0.74  | 0.63  | -0.43 |       | -0.33 | -0.01 | -1.08 | -0.26 | 0.04  | -0.21 |
| 166 | 0.58  | -0.38 | 0.04  | 0.66  | 0.19  | -0.49 | 0.16  | 0.15  | -0.60 | 0.55  | -0.04 | -0.37 | 0.38  | 0.42  | -0.01 | -0.55 | -0.14 | 0.35  | 0.48  |       |
| 167 | -0.38 | 0.24  | -0.01 | -0.23 | -0.36 | -0.65 | 0.24  | 0.00  | -0.63 | -0.28 | -0.44 | -0.35 | -0.12 | 0.21  |       | -0.26 | 0.56  | -0.25 | -0.66 | 0.81  |
| 168 | 0.74  | 0.15  | 0.80  | 0.52  | 0.28  | 0.18  | 0.35  | -0.63 | -0.01 |       | -0.20 | -0.39 | -0.60 | -0.21 | -0.71 | 0.05  | -0.60 | 0.29  | 0.45  | 0.42  |
| 169 | -0.35 | -0.14 | -0.41 | -0.24 | 0.00  | 0.00  | 0.47  | -0.20 |       | -0.13 | -0.02 | 0.14  | -0.11 | -0.04 | -0.06 | 0.17  | -0.01 | -0.19 | -0.03 | -0.25 |
| 170 | -0.72 | 0.46  | -0.99 | -0.25 | 0.25  | -0.29 | -0.08 | -0.14 |       | 0.77  | 0.45  | -0.12 | -0.74 | -0.59 | -0.05 | 0.33  | -0.14 | -0.15 | 0.18  | 0.03  |
| 171 | -0.14 | -0.49 | 0.26  | -0.39 | -0.20 | 0.04  | 0.29  |       | 0.04  | 0.33  | -0.22 | 0.95  | -1.16 | 0.27  | -0.34 | 0.17  | -0.04 | -0.25 | 0.21  | 0.46  |
| 172 | 0.25  | -0.40 | 0.39  | 0.69  | 0.53  | -0.06 | 1.54  | 0.46  | 1.26  | -0.03 | 0.35  | 0.32  | 0.45  | 0.41  | 0.42  |       | 0.64  | 0.33  | -0.76 | -0.14 |
| 173 | -0.90 | -0.93 | -0.38 | -0.54 | -0.03 | 0.94  | 0.15  | -0.64 |       | 0.68  | -0.02 | 1.32  | -0.96 | 1.31  | 0.67  | -0.03 | 0.03  | 0.10  | 0.54  | 0.17  |
| 174 | 0.02  | 0.95  | 0.41  |       | 0.53  | 0.06  | -0.10 | -0.15 | 0.09  | -0.14 | -0.28 | 0.41  | 0.86  | 0.38  | 0.33  | 0.25  | 0.63  | 0.37  | 0.67  | 0.04  |
| 175 | -0.17 | 0.80  | 0.10  |       | 0.41  | -0.51 | 0.14  | 0.19  | 0.02  | 0.37  | 0.55  | 0.66  | 0.69  | -0.39 | -0.18 | 0.10  | 0.26  | -0.04 | 0.76  | -0.18 |
| 176 | 0.34  | 0.32  | -0.18 | -0.24 | 0.13  | -0.12 | 0.63  | 0.39  |       | 0.50  | 1.19  | 0.01  | -0.27 | -0.16 | 0.38  | 0.59  | 0.55  | 0.26  | -0.13 | 0.73  |
| 177 | 0.31  | 0.66  | -0.21 | 0.40  | -0.53 | -0.12 | -0.28 | -0.19 | -0.61 | -0.06 | -0.42 | -0.31 | -0.02 | 0.28  | 0.70  | 0.66  |       | 0.48  | 0.43  | -0.12 |
| 178 | -0.48 | -0.57 | 1.16  | -0.19 | -0.25 | 0.30  | 0.48  | -0.28 | 0.33  | 0.96  | -0.37 | -0.08 |       | 0.41  | -0.83 | -0.06 | 0.34  | -0.08 | -0.03 | 0.74  |
| 179 | -0.04 | 0.10  | -1.02 | -0.27 | 0.76  |       | -0.14 | 0.45  | 0.78  | -0.56 | -0.06 | 0.18  | -0.21 | 0.42  | 0.17  | 0.77  | -0.09 | -0.23 | 0.40  | -0.03 |
| 180 | 0.19  |       | -0.25 | 0.82  | 0.09  | 0.00  | -0.21 | -0.70 | 0.04  | 0.03  | -0.50 | -0.24 | -0.39 | 1.01  | -1.22 | 0.66  | -0.32 | 1.03  | -0.08 | -0.34 |
| 181 | 0.71  | -0.53 | -0.05 | 0.19  | 0.33  | 0.74  | 0.37  | -0.49 | -0.03 | -0.97 | 0.27  | -0.51 | 0.98  | 0.40  | -0.03 | 0.09  | -0.29 |       | -0.46 | 0.35  |
| 182 | -0.52 | 0.16  | 0.76  | -0.11 | -0.22 | 0.20  | -0.34 | 0.03  |       | -0.03 | 0.05  | -0.26 | 0.21  | -0.23 | 0.35  | -0.10 | 0.82  | -0.16 | 0.09  | 0.54  |
| 183 | -0.32 | 0.20  | -0.31 | 0.01  | -0.33 | -0.94 | 0.82  |       | -0.08 | -0.14 | -0.33 | -0.92 | 0.75  | -0.52 | -0.20 | 0.36  | -0.44 | -0.52 | -0.36 | -0.25 |
| 184 | 0.32  | 0.09  | 0.39  | 0.17  | -0.22 | 0.09  | 1.81  | -0.27 |       | -0.33 | -0.93 | -0.04 | -0.11 | -0.18 | -0.15 | 0.36  | 0.16  | 0.59  | -0.71 | 0.31  |
| 185 | -0.70 | -0.27 | 0.43  | -0.19 | 1.06  | 0.39  | -0.54 | 0.36  |       | -0.01 | -0.39 | -0.59 | 0.18  | -0.31 | -0.54 | -0.84 | -0.85 | 0.42  | -0.10 | 0.77  |
| 186 | -0.10 |       | 0.80  | -0.27 | 0.03  | -0.63 | -0.60 | 0.23  | -0.53 | -0.22 | 0.12  | -0.37 | -0.89 | 0.45  | -0.24 | 0.37  | 0.24  | 0.23  | -0.65 | 1.20  |
| 187 | 0.37  | -0.25 | -0.69 | 0.60  | -0.43 | -0.29 | 0.71  |       | -0.64 | 0.31  | 0.34  | 0.37  | 0.33  | -0.10 | 0.31  | -1.04 | -0.37 | 0.45  | -0.05 | 0.63  |
| 188 | -0.05 | -0.62 | 0.47  | -0.36 | -0.13 | -0.70 | -0.60 |       | -0.22 | -0.16 | -0.36 | 0.66  | 0.03  | 0.04  | -0.56 | -0.29 | 0.89  | -0.04 | -0.86 | -0.09 |
| 189 | 0.24  | -0.71 | -0.51 | -0.27 | -0.31 | -0.51 | -0.37 | 0.42  | 0.05  | 0.08  |       | -0.13 | -0.45 | 0.21  | -0.10 | 0.27  | -0.49 | 0.33  | -0.27 | -0.26 |

### Average Z-score from adagrasib-treated groups

| position | A     | C     | D     | E     | F     | G     | H     | I     | K     | L     | M     | N     | P     | Q     | R     | S     | T     | V     | W     | Y     |
|----------|-------|-------|-------|-------|-------|-------|-------|-------|-------|-------|-------|-------|-------|-------|-------|-------|-------|-------|-------|-------|
| 2        | 0.16  | 0.40  | -0.57 | -0.38 | 0.18  | -0.23 | -0.26 | 0.60  | -0.22 | -1.45 | -0.11 | 0.37  | -0.83 | -0.35 | -0.08 | 0.71  |       | 0.01  | -0.69 | -0.77 |
| 3        | 0.15  | -0.68 | -0.44 |       | -0.16 | 0.02  | -0.94 | 0.02  | -0.35 | -0.59 | 0.57  | 0.85  | -0.59 | -0.59 | -0.75 | -0.29 | -0.09 | 0.45  | -0.04 | -0.48 |
| 4        | -0.27 | -0.15 | -0.09 | 0.75  | 1.17  | -0.58 | -0.61 | 0.26  | -0.09 | -0.36 | -0.97 | -0.23 | 0.86  | -0.06 | 0.11  | 0.19  | -0.23 | -1.07 | 0.23  |       |
| 5        | 1.47  | -0.08 | -0.19 | 0.54  | -1.05 | -0.02 | 0.67  | 0.37  |       | 1.42  | -0.52 | 0.25  | 0.21  | 0.82  | 0.01  | -0.11 | -0.02 | -0.46 | -0.86 | -0.14 |
| 6        | -0.54 | -0.51 | 0.19  | -0.87 | 0.52  | -0.42 | 0.60  | -0.02 | -1.03 |       | -0.11 | -0.43 | 0.22  | -0.42 | -0.09 | 0.24  | 0.80  | 0.63  | 0.78  | 0.06  |
| 7        | -0.58 | -0.17 | 0.04  | 0.19  | 0.62  | 0.12  | -0.75 | -0.64 | -0.35 | 0.02  | -0.04 | 0.35  | 0.22  | 0.75  | 0.32  | 0.42  | -0.07 |       | -0.51 | -0.22 |
| 8        | 1.61  | 1.68  | -0.56 | 1.91  | 1.69  | 0.53  | 1.01  | 0.06  | 0.53  | 1.38  | 1.10  | -0.27 | 1.72  | 0.96  | -0.62 | 0.89  | 1.19  |       | 0.06  | -0.29 |
| 9        | -0.42 | -0.77 | 0.90  | 1.52  | 4.23  | 0.54  | 3.45  | -0.60 | 1.36  | 1.22  | 0.92  | -0.20 | -0.31 | 1.15  | 3.03  | 0.16  | 0.06  |       | 2.43  | 3.57  |
| 10       | 0.68  | -0.06 | -0.38 | -0.05 | -0.28 |       | 0.05  | -0.28 | 0.37  | 0.33  | -0.29 | 0.28  | -0.64 | 0.29  | 0.59  | -0.25 | -0.37 | -0.11 | -0.02 | -0.16 |
| 11       |       | -0.20 | 0.21  | -0.20 | 0.13  | 0.28  | 0.10  | 2.20  | 0.14  | 0.90  | 1.09  | 0.04  | 0.36  | 0.09  | 2.04  | 0.97  | 0.67  | 0.62  | -0.09 | 0.14  |
| 12       | 1.29  |       | 1.94  | 1.77  | 2.53  | -0.08 | 2.65  | 2.32  | 0.99  | 1.20  | 2.07  | 3.27  | 0.31  | 0.91  | 0.79  | 1.05  | 1.47  | 0.56  | 1.13  | 1.67  |
| 13       | -0.94 | -0.99 | 0.90  | 1.81  | 0.53  |       | -0.30 | 0.24  | 0.40  | -0.44 | -0.07 | 0.11  | 1.20  | 0.84  | 0.26  | 0.18  | 0.80  | 0.71  | -0.09 | 0.01  |
| 14       | -0.51 | -0.22 | -0.73 | -0.37 | -1.62 | 0.17  | -0.31 | 0.08  | -0.54 | 0.33  | 0.27  | -0.14 | 0.06  | -0.22 | 0.05  | 0.63  | -1.14 |       | -0.50 | 0.05  |
| 15       | -0.31 | -0.22 | 1.19  | -1.27 | -0.93 |       | -1.51 | -1.51 | -0.53 | -1.60 | -0.51 | 0.04  | -0.17 | -0.92 | -1.46 | -0.31 | -0.88 | -0.87 | -0.96 | -1.32 |
| 16       | -1.41 | -0.59 | -1.07 | -0.19 | -0.01 | 0.25  | 0.13  | -1.29 |       | -0.75 | -0.42 | 0.33  | -0.51 | 0.16  | -0.97 | -1.06 | -3.64 | -0.98 | -0.21 | -0.07 |
| 17       | -0.63 | -1.52 | -0.33 | -1.64 | 0.04  | -0.75 | 0.46  | -0.94 | -1.19 | -0.10 | -0.60 | -0.94 | 0.04  | 0.06  | 0.39  |       | -0.52 | -0.36 | -0.08 | 1.71  |
| 18       |       | -0.20 | -0.37 | 1.10  | -0.57 | -0.13 | -0.17 | -0.67 | -0.59 | -0.07 | 0.18  | 0.08  | -0.50 | -0.39 | -0.29 | 0.34  | 0.05  | -0.44 | -0.04 | -0.01 |
| 19       | -0.22 | -0.77 | -0.53 | -0.66 | -0.34 | -0.02 | -0.75 | -0.62 | -0.36 |       | -0.33 | 0.13  | 1.08  | 0.32  | 0.58  | -1.27 | 0.58  | -0.14 | -0.05 | 0.25  |
| 20       | -1.46 | 0.15  | -0.02 | -0.24 | -0.62 | 0.19  | -0.64 | 1.16  | -0.03 | 0.69  | -0.09 | 0.88  | -0.04 | 0.19  | -0.31 | 0.57  |       | -0.15 | -0.58 | 0.03  |
| 21       | -0.38 | -0.87 | -0.74 | -1.01 | -0.54 | 0.68  | 0.33  |       | -0.12 | -0.01 | 0.02  | -0.24 | -0.26 | 0.71  | 0.33  | -0.56 | 0.16  | -0.26 | 0.61  | -0.50 |
| 22       | -0.01 | -0.89 | -0.03 | 0.37  | -0.12 | 0.18  | 0.37  | 0.70  | 0.18  | -0.01 | -3.81 | -0.11 | -0.37 |       | 0.35  | 0.07  | -0.92 | 0.10  | 0.07  | -0.52 |
| 23       | -0.32 | -0.24 | -0.38 | -0.79 | -0.71 | 0.68  | -0.42 | 0.85  | -1.02 |       | -2.02 | -1.32 | 0.44  | 0.17  | 0.39  | 0.72  | -0.13 | -0.01 | -0.25 | 0.70  |
| 24       | 1.20  | -0.58 | 0.19  | 0.23  | 0.02  | 0.46  | 0.15  |       | -0.99 | -0.21 | 0.03  | -0.41 | -1.35 | 0.28  | 0.35  | -0.46 | 0.06  | -0.51 | 0.08  | 0.03  |
| 25       | 1.12  | 0.08  | -0.96 | 0.37  | -0.20 | -0.41 | -0.03 | -0.23 | -0.32 | -0.07 | 0.20  | 0.22  | 0.27  |       | -0.12 | -0.58 | -0.65 | -0.48 | -0.15 | -0.44 |
| 26       | -0.16 | -0.45 | 0.13  | -0.27 | 0.07  | 0.01  | -0.91 | 0.17  | -0.14 | 0.50  | 0.40  |       | -0.45 | -0.37 | -0.85 | 0.89  | 0.42  | 0.86  | 0.68  | 0.27  |
| 27       | 0.27  | -0.65 | -0.06 | 0.51  | 0.07  | -0.60 |       | -0.42 | -0.38 | -0.15 | -0.12 | 0.22  | 0.14  | -0.06 | 1.10  | 0.50  | 0.33  | -0.78 | 0.72  | -0.82 |
| 28       | -0.10 | -0.51 | 0.02  | -0.42 |       | -1.25 | -1.37 | -0.42 | -0.74 | -0.05 | 0.69  | -0.23 | 0.25  | -0.61 | -0.78 | -0.23 | 0.55  | 0.18  | 0.23  | 0.09  |
| 29       | 0.48  | -0.05 | 0.26  | -0.63 | 1.17  | -0.70 | 0.06  | -0.75 | -0.67 | 0.48  | -0.14 | -0.92 | -0.22 | -0.20 | -2.03 | 0.47  | 0.06  |       | 1.03  | 0.28  |
| 30       | -0.66 | 0.14  |       | -0.23 | 0.70  | 0.51  | 0.92  | 1.00  | -0.24 | 0.27  | -0.35 | 0.07  | -0.18 | 0.12  | -0.25 | 0.50  | -0.06 | 0.30  | -0.17 | 0.44  |
| 31       | -0.99 | -0.14 | -0.29 |       | 0.41  | -0.29 | -0.52 | 0.50  | -0.13 | 0.20  | 0.15  | 0.86  | -0.11 | -0.56 | 0.66  | 0.47  | -0.28 | 0.04  | 0.46  | -0.05 |
| 32       | -1.49 | -0.36 | 0.08  | -1.44 | -0.49 | -0.67 | -0.83 | -1.39 | -0.04 | -1.45 | -0.87 | -0.38 | -1.11 | -0.63 | -0.34 | -1.52 | 0.32  | -0.20 | -0.20 |       |
| 33       | -0.17 | -1.29 |       | 0.39  | -0.54 | -0.13 | -0.60 | -0.36 | -0.70 | -1.15 | 0.27  | 0.70  | -0.77 | -1.29 | -1.44 | -1.16 | 0.04  | -1.68 | -1.47 | -0.37 |
| 34       | 0.64  | -0.33 | -0.32 | -0.35 | 0.37  | -0.84 | 0.24  | -1.16 | -0.16 | 0.18  | 0.01  | 0.67  |       | -0.15 | -0.41 | -0.09 | 0.33  | 0.19  | -1.04 | 0.58  |
| 35       | -0.17 | 0.00  | -0.49 | -0.01 | -0.30 | -0.10 | 0.42  | -0.49 | -1.14 | -3.05 | 0.22  | -0.68 | -1.17 | -0.04 | -0.03 | -0.26 |       | -0.78 | -0.12 | -1.71 |
| 36       | -0.79 | 0.38  | -0.36 | -0.79 | 0.25  | -1.56 | -0.77 |       | -0.60 | -0.59 | -0.26 | -1.01 | -0.17 | -0.46 | -0.30 | -1.16 | -1.24 | 0.26  | 0.81  | -0.06 |
| 37       | 0.24  | 0.98  | 0.58  |       | 0.03  | 0.34  | 0.13  | -0.58 | 0.14  | 0.25  | -0.12 | -0.98 | -0.14 | -0.40 | -0.38 | 1.33  | -1.39 | -0.34 | 0.17  | -3.45 |



|    |       |       |       |       |       |       |       |       |       |       |       |       |       |       |       |       |       |       |       |       |
|----|-------|-------|-------|-------|-------|-------|-------|-------|-------|-------|-------|-------|-------|-------|-------|-------|-------|-------|-------|-------|
| 38 | 0.24  | 0.26  |       | 0.44  | -0.24 | 0.12  | -0.54 | -0.50 | -0.39 | 0.46  | 0.15  | -0.97 | 0.24  | 0.86  | 0.56  | 0.09  | 0.24  | 1.19  | 0.21  | 0.56  |
| 39 | -0.12 | 0.91  | -0.25 | 0.18  | -0.37 | 0.65  | 0.22  | -0.91 | 0.32  | 0.51  | -0.10 | 0.05  | -0.90 | -0.23 | 0.04  |       | -0.23 | 0.96  | -0.09 | 0.14  |
| 40 | 0.03  | -0.35 | 0.19  | 1.25  | -0.09 | 0.81  | 0.01  | -0.87 | -1.22 | -0.29 | 0.02  | -0.29 | 0.26  | -0.78 | -0.49 | 0.07  | 0.01  | 0.06  | -0.12 |       |
| 41 | 0.00  | -0.72 | 0.08  | -0.28 | 0.20  | -0.16 | -0.12 | -0.47 | -0.37 | -0.74 | -0.06 | -0.36 | 0.72  | 0.72  |       | 0.22  | -1.43 | 0.05  | -0.48 | -0.32 |
| 42 | 0.61  | -0.40 | -1.15 | -0.11 | -0.10 | 0.20  | 1.32  | 0.22  |       | -0.47 | -0.85 | -0.01 | 0.20  | 0.45  | 0.43  | 0.45  | 0.39  | 0.02  | 1.16  | -0.07 |
| 43 | 0.93  | -0.47 | 0.79  | -0.23 | 0.16  | -1.07 | -0.05 | -0.32 | 0.71  | 0.56  | 0.27  | 0.05  | -0.26 |       | -0.05 | 0.55  | -0.29 | -0.14 | 0.42  | 0.25  |
| 44 | 0.21  | -0.84 | -0.42 | -1.31 | 0.12  | -0.88 | -0.83 | 0.22  | -0.86 | -0.09 | -0.31 | -0.60 | -0.91 | -1.58 | -0.90 | -0.79 | 0.44  |       | 0.41  | -0.26 |
| 45 | 0.02  | 0.18  | -0.05 | -1.32 | -0.85 | -0.19 | -0.55 | -0.05 | -0.04 | -0.79 | 0.41  | -0.61 | -1.33 | -0.52 | -1.26 | -0.82 | -0.67 |       | -0.87 | -0.61 |
| 46 | -0.12 | -0.06 | 1.46  | -0.06 | 0.60  | -0.06 | 0.56  |       | -0.06 | 0.70  | 0.07  | 0.45  | -0.33 | -0.06 | 1.72  | -1.59 | -1.02 | -1.06 | -0.06 | -0.06 |
| 47 | 0.08  | -0.18 |       | -0.35 | -0.12 | 0.05  | 0.80  | 0.47  | -0.75 | -0.38 | 0.60  | 1.67  | 0.62  | 0.51  | 2.07  | -0.36 | -0.25 | 0.43  | -0.20 | 0.80  |
| 48 | -0.04 | 0.07  | -0.40 | 1.02  | -0.78 |       | 1.04  | 0.09  | -0.44 | -0.27 | -0.22 | 0.31  | 0.34  | -0.39 | 0.24  | 0.87  | -0.94 | -0.82 | 0.24  | 1.32  |
| 49 | -0.88 | 0.42  | -0.19 |       | -0.44 | -0.44 | -0.55 | 0.73  | 0.52  | -0.24 | 0.37  | 0.74  | 0.44  | 0.79  | -0.49 | -0.02 | 0.02  | -0.23 | -0.07 | 1.33  |
| 50 | 0.19  | -0.09 | -0.46 | -0.37 | 0.29  | -0.63 | 0.78  | 0.38  | 0.50  | -0.76 | -0.42 | 0.04  | 0.32  | -0.54 | -0.27 | 0.50  |       | 0.22  | -0.12 | 0.33  |
| 51 | -0.73 |       | -0.06 | -0.13 | -0.94 | -0.35 | 0.03  | 0.35  | 0.41  | 0.06  | -0.16 | -0.55 | 0.38  | -0.04 | -0.14 | -1.21 | -0.47 | -0.67 | -0.36 | -0.12 |
| 52 | 0.09  | -0.31 | 0.48  | -0.35 | -0.34 | -0.19 | -0.01 | 0.48  | 0.40  |       | -0.73 | 0.70  | 0.75  | 0.24  | 0.26  | -0.21 | 1.22  | 0.15  | -0.08 | -0.62 |
| 53 | -0.37 | -0.29 | 0.76  | -0.49 | 0.24  | 0.09  | 0.34  | -0.86 | 0.90  |       | -0.07 | -0.38 | 0.51  | 0.29  | 0.16  | -0.77 | 0.07  | -0.01 | 0.18  | 0.29  |
| 54 | 0.25  | -0.11 |       | 0.21  | 0.41  | 0.13  | 0.61  | 0.82  | -0.75 | -0.66 | 0.17  | 0.13  | -0.09 | 0.30  | -0.42 | 0.19  | 0.13  | -0.25 | -0.80 | 0.27  |
| 55 | -0.33 | -0.56 | -0.39 | -0.89 | -0.15 | -0.38 | 0.95  |       | -0.11 | 0.03  | -0.47 | 0.29  | 0.24  | -0.26 | 0.99  | 0.63  | 0.83  | 0.18  | -0.41 | 0.10  |
| 56 | 0.07  | -0.80 | 0.08  | 1.50  | -0.13 | 0.34  | 0.28  | 0.13  | -0.31 |       | -0.17 | -0.42 | 0.19  | 0.73  | -0.12 | 0.50  | -0.92 | 0.23  | -0.07 | 0.12  |
| 57 | -0.08 | 0.39  |       | 0.56  | -1.20 | 0.04  | 0.37  | -0.30 | 0.10  | 0.61  | -0.32 | 0.71  | 0.25  | -0.09 | -0.79 | -0.30 | 0.04  | -0.74 | -0.05 | -0.35 |
| 58 | -0.21 | 0.45  | 0.14  | -0.34 | 1.80  | 0.88  | 0.02  | 0.64  | -0.40 | 0.54  | 0.40  | 0.15  | 0.46  | -0.40 | 0.45  | -0.56 |       | -0.12 | -0.05 | 0.02  |
| 59 |       | 0.37  | -0.28 | -0.92 | 2.11  | -0.13 | 0.90  | 1.70  | 0.50  | 0.87  | 0.08  | 0.06  | 0.57  | -0.14 | -0.09 | 0.35  | -0.20 | 0.58  | 0.15  | 0.30  |
| 60 | -0.70 | 0.81  | 0.23  | 0.39  | -0.17 |       | 0.48  | 0.65  | -0.03 | 0.37  | -0.48 | -0.11 | 0.50  | 0.20  | -1.09 | 1.02  | 0.09  | 0.56  | -0.27 | -0.62 |
| 61 | 0.02  | 0.03  | 0.40  | -0.13 | 0.83  | 0.11  | 0.06  | -1.22 | -0.43 | 0.86  | -0.91 | -1.13 | 0.63  |       | 0.35  | 0.20  | -1.14 | -0.44 | -0.36 | 0.73  |
| 62 | 0.28  | -0.39 | 0.27  |       | 0.12  | -0.54 | 0.68  | -0.63 | 0.37  | 0.00  | -0.13 | 1.05  | 0.26  | -0.39 | 0.56  | -0.37 | 0.82  | 0.75  | -1.15 | -0.73 |
| 63 | -0.04 | 0.65  | 0.22  |       | 0.14  | -0.20 | 0.15  | 0.49  | 0.13  | 0.89  | -0.03 | -0.10 | 1.64  | 0.18  | 0.65  | -0.34 | 0.53  | 0.18  | -0.21 | 0.22  |
| 64 | -0.23 | 0.17  | -0.16 | 0.38  | 0.92  | 0.90  | 0.06  | 0.49  | -0.06 | 2.02  | 0.76  | -0.03 | -0.32 | -0.10 | -0.78 | 0.26  | 0.44  | -1.13 | 0.71  |       |
| 65 | 1.38  | -0.36 | 0.71  | 0.27  | 0.94  | -0.06 | 0.03  | 0.78  | 0.74  | 1.83  | 0.50  | 0.05  | 0.66  | 0.53  | -0.12 |       | -0.20 | 0.40  | 2.01  | 1.55  |
| 66 |       | -0.29 | -0.11 | -0.02 | -0.94 | 0.22  | -0.63 | 0.54  | -1.04 | 0.32  | 0.22  | -0.58 | -0.18 | -0.20 | -0.08 | -0.64 | -1.01 | -0.07 | 0.13  | -0.42 |
| 67 | -0.44 | -0.51 | -1.02 | -0.17 | 0.83  | -1.26 | 0.68  | 0.14  | 0.00  | 0.00  |       | 0.09  | 1.01  | -0.52 | 0.17  | 0.04  | -0.53 | -0.03 | -1.03 | -0.28 |
| 68 | 2.76  | 2.64  | 5.17  | 5.15  | 3.90  | 2.37  | 2.51  | 0.96  | 0.19  | 4.34  | 0.90  | 3.69  | 3.21  | 1.61  |       | 2.67  | 0.80  | 0.38  | 2.90  | 2.98  |
| 69 | 0.26  | -1.46 |       | 0.09  | -0.49 | -1.23 | -0.07 | -0.42 | -0.65 | -0.81 | -1.08 | -0.48 | 1.44  | 0.61  | -0.32 | -0.14 | -0.31 | -0.29 | -1.04 | -0.48 |
| 70 | 0.86  | -0.27 | 1.55  | 0.49  | -0.05 | -0.50 | -0.20 | -0.50 | 0.15  | 0.05  | -1.08 | 0.04  | 0.55  |       | -0.98 | 0.40  | 1.19  | -0.29 | -0.32 | -1.29 |
| 71 | -0.69 | 0.27  | -0.09 | 0.58  | -0.19 | -0.61 | 0.18  | -0.43 | -0.29 | -0.16 | -0.54 | 0.11  | 0.51  | -0.64 | 0.06  | -0.33 | 0.73  | -1.87 | -0.15 |       |
| 72 | 0.83  | 1.39  | 2.78  | 0.88  | -1.00 | 1.37  | 1.52  | 1.38  | 0.02  | 0.15  |       | 0.65  | -0.03 | 0.12  | 0.35  | 1.16  | 2.11  | 0.96  | 4.14  | 0.85  |
| 73 | 0.10  | -0.59 | -0.13 | 0.91  | 0.65  | -0.79 | 0.61  | -0.63 | -0.02 | 0.07  | 0.18  | 0.18  | 1.34  | 0.44  |       | -0.14 | -0.30 | 0.37  | -0.31 | -0.10 |
| 74 | 0.47  | 0.55  | -0.03 | 1.60  | 0.11  | 0.64  | 0.04  | 0.57  | -0.50 | -0.07 | 0.16  | 0.34  | 0.12  | -0.28 | 0.94  | -0.58 |       | -0.63 | 0.68  | -0.37 |
| 75 | -0.09 |       | 0.03  | -0.07 | -0.25 |       |       |       | -0.29 | -1.16 | -0.29 | -0.10 | -0.24 | -0.86 | -0.33 |       | -0.84 | -0.07 | -0.08 | 0.24  |
| 76 | -0.52 | -0.44 | -0.10 |       | -1.05 | -0.19 | -0.20 | -1.50 | -0.45 | -0.92 | -0.71 | -0.85 | -0.80 | 0.04  | -0.75 | -0.83 | -0.94 | -0.01 | -0.06 | -0.51 |

|            |       |       |       |       |       |       |       |       |       |       |       |       |       |       |       |       |       |       |       |       |
|------------|-------|-------|-------|-------|-------|-------|-------|-------|-------|-------|-------|-------|-------|-------|-------|-------|-------|-------|-------|-------|
| <b>77</b>  | -0.50 | -0.04 | -0.70 | -0.09 | 0.70  |       | 0.48  | -0.79 | -1.16 | -0.51 | -0.35 | 0.13  | -0.74 | 0.07  | -0.94 | -0.09 | -0.70 | -0.51 | -0.70 | 1.01  |
| <b>78</b>  | 0.22  | 0.06  | 0.23  | -0.56 |       | 1.62  | 0.43  | 1.29  | -0.79 | 1.32  | 0.61  | -0.95 | 0.78  | -0.86 | -0.79 | -0.18 | 0.07  | 1.23  | -0.07 | 0.14  |
| <b>79</b>  | 0.33  | 0.16  | -0.39 | -0.11 | 0.50  | -0.61 | -0.17 | 0.24  | -0.87 |       | 0.14  | 0.07  | 0.17  | -0.36 | -0.71 | 0.36  | -0.41 | 1.02  | -0.03 | 0.15  |
| <b>80</b>  | -0.46 |       | -0.04 | -0.76 | 0.37  | -0.44 | -0.25 | 0.50  | 1.20  | -0.37 | -0.50 | -0.17 | 0.22  | -0.67 | -0.34 | -0.06 | -0.34 | 0.57  | -0.50 | 0.25  |
| <b>81</b>  | 0.31  | -0.57 | 0.20  | -1.19 | -0.29 | 0.53  | -0.13 | -0.36 | -0.02 | 0.21  | -0.38 | 0.26  | -0.29 | -0.59 | -0.50 | -0.41 | 0.69  |       | -0.80 | 1.01  |
| <b>82</b>  | -0.25 | -0.07 | 0.26  | -0.23 |       | 0.25  | 0.11  | -1.19 | -0.27 | -0.48 | -0.43 | 0.13  | -0.44 | -0.44 | 0.21  | -0.60 | 0.10  | 0.37  | 0.02  | -0.31 |
| <b>83</b>  |       | 0.38  | 0.21  | -0.16 | -0.80 | -0.01 | -0.85 | 0.36  | 0.50  | -0.31 | 0.04  | -0.31 | -0.62 | -0.99 | -0.50 | 0.46  | 0.04  | 0.08  | 0.15  | -0.63 |
| <b>84</b>  | 0.26  | -0.45 | -0.08 | -0.61 | -0.30 | -0.64 | -0.39 |       | 0.23  | 0.22  | 0.11  | -0.14 | 0.89  | 0.42  | -0.25 | -0.26 | -0.18 | -0.29 | -0.08 | -0.12 |
| <b>85</b>  | 0.82  | -0.02 | 0.00  | -0.34 | 0.03  | 0.04  | 0.43  | -0.14 | 0.32  | -1.21 | -0.60 |       | -0.15 | -0.72 | 0.10  | -0.14 | -0.83 | 0.23  | -0.44 | -0.54 |
| <b>86</b>  | -0.66 | -0.09 | -0.46 | -0.56 | -0.51 | -0.29 | -0.92 | 0.68  | 0.13  | 0.08  | 0.02  |       | 0.31  | -0.65 | 0.50  | -0.50 | 0.03  | -1.07 | -0.30 | 0.02  |
| <b>87</b>  | -0.08 | 0.42  | 0.34  | -0.05 | -0.33 | -0.48 | -0.03 | -0.02 | -0.30 | -0.53 | 0.08  | -0.33 | 0.01  | 0.04  | -0.75 | 0.33  |       | -0.47 | 0.42  | -1.03 |
| <b>88</b>  | 0.96  | -0.25 | -0.42 | -0.59 | -0.40 | 0.38  | -1.28 | -0.65 |       | 0.14  | -0.56 | -0.46 | 0.13  | -0.09 | -0.36 | 0.10  | -0.07 | -1.12 | 0.02  | 0.49  |
| <b>89</b>  | -0.64 | -0.77 | -1.28 | 0.72  | -0.50 | 0.21  | -0.04 | -0.52 | -0.38 | 0.54  | -0.16 | -0.70 | -0.81 | -0.69 | 1.17  |       | -1.09 | -0.32 | 0.35  | -0.38 |
| <b>90</b>  | -1.25 | 0.12  | -0.37 | -1.21 |       | -0.58 | -0.13 | -0.58 | -0.43 | -0.27 | 0.57  | 0.31  | -0.11 | -0.95 | 0.03  | -1.60 | 0.64  | 0.28  | -0.02 | -0.41 |
| <b>91</b>  | 0.45  | -0.07 | 0.16  |       | -0.51 | 0.52  | -0.41 | 0.12  | 0.17  | 0.93  | -0.27 | -0.24 | 0.04  | 0.06  | 0.92  | -0.62 | 0.07  | 0.36  | 1.73  | -0.01 |
| <b>92</b>  | 0.53  | 0.68  |       | 0.19  | 0.37  | -0.11 | -0.66 | 0.96  | 1.04  | 2.30  | 1.43  | -0.25 | 0.66  | -0.96 | 2.53  | 0.72  | -0.62 | 0.24  | 1.27  | 0.86  |
| <b>93</b>  | -0.41 | -0.61 | 0.06  | -0.13 | 0.19  | 0.54  | -0.15 |       | 0.15  | -0.20 | 0.08  | -0.70 | -0.25 | -0.59 | 0.61  | 0.22  | 0.62  | 0.39  | 0.06  | -0.36 |
| <b>94</b>  | 0.20  | -1.01 | 0.28  | 0.24  | -0.02 | 0.18  |       | -0.34 | 0.14  | -0.83 | -0.06 | 0.75  | -0.62 | 0.06  | -0.36 | 1.45  | 0.08  | -0.06 | -0.06 | 0.58  |
| <b>95</b>  | 4.08  | 2.48  | 2.50  | 2.63  | 1.36  | 3.29  |       | 0.66  | 2.25  | 2.51  | 2.33  | 2.60  | 1.15  | 2.36  | 3.77  | 1.59  | 2.18  | 1.99  | 2.16  | 1.04  |
| <b>96</b>  | 2.79  | 3.30  | 1.82  | 1.84  | -0.46 | 1.05  | 2.10  | 0.92  | 2.56  | 4.09  | 2.83  | 2.53  | 0.34  | 2.62  | 2.41  | 2.24  | 3.27  | 1.95  | 3.15  |       |
| <b>97</b>  | -0.55 | 0.07  | -0.49 | -0.31 | -0.13 | -0.50 | -0.64 | 0.07  | -0.47 | 0.78  | 0.14  | 0.61  | 2.41  | -0.02 |       | -0.43 | -0.42 | -0.85 | -0.33 | -0.30 |
| <b>98</b>  | -0.37 | -0.58 | 0.57  |       | 0.31  | -0.23 | 0.31  | -0.11 | -0.51 | 0.58  | -0.25 | 0.00  | 0.27  | 0.49  | -1.27 | 0.15  | -0.20 | 0.15  | -0.24 | -0.42 |
| <b>99</b>  | 1.12  | 0.52  | 3.87  | 0.60  | 2.51  | 2.17  | 0.36  | 1.35  | 0.22  | 1.41  | 0.45  | 0.36  | -0.19 |       | 2.07  | 1.58  | 0.52  | 1.65  | 4.70  | 2.11  |
| <b>100</b> | -0.46 | -0.21 | -0.54 | 0.11  | 0.08  | -0.98 | -0.24 | 0.17  | -0.79 | 0.96  | -0.24 | -0.62 | -0.04 | -0.11 | -0.48 | -0.55 | -0.62 | -0.56 | -0.79 | -0.44 |
| <b>101</b> | 1.11  | -0.04 | -0.46 | 0.35  | 0.22  | 0.36  | -0.07 |       |       | -0.08 | 0.09  | 1.06  | -0.18 | 0.94  | 0.42  | 0.28  | 0.37  | -0.17 | 0.29  | 0.69  |
| <b>102</b> | -0.25 | 0.78  | 0.02  | 0.14  | 1.03  | -0.23 | 0.38  | 0.34  | 0.56  | 0.61  | 1.09  | 0.54  | 1.60  | 0.84  |       | 0.11  | 0.73  | 1.01  | -0.16 | -0.32 |
| <b>103</b> | 0.91  | 0.22  | 0.17  | 2.00  | 0.18  | -0.32 | 0.61  | 1.47  | -0.88 | 1.32  | 0.92  | 0.93  | 0.71  | 1.85  | 0.78  | 0.93  | 0.08  |       | 0.12  | -0.47 |
| <b>104</b> | -0.29 | 0.20  | 0.31  | -0.03 | 0.58  | 0.13  | 0.22  | 0.80  |       | 0.73  | -0.01 | 0.00  | -0.62 | 0.19  | -0.10 | -0.45 | -0.98 | 1.05  | 0.35  | -0.36 |
| <b>105</b> | -0.13 | -0.51 |       | -0.26 | -0.07 | 0.15  | 0.09  | -0.18 | -0.55 | 0.10  | 0.02  | 0.35  | -0.57 | -0.11 | -0.69 | -0.69 | 0.09  | 0.10  | 0.60  | -0.06 |
| <b>106</b> | -0.20 | 0.00  | 0.36  | -0.57 | -0.63 | 0.04  | -0.93 | 0.15  | 0.09  | -0.28 | -0.32 | -0.49 | -0.60 | 0.66  | -0.22 |       | 0.32  | -0.01 | 0.41  | 1.07  |
| <b>107</b> | 0.00  | -0.03 | 0.12  |       | 0.35  | -0.09 | -0.62 | 0.48  | -0.18 | -0.44 | 0.11  | -0.01 | -0.39 | 0.10  | -0.64 | -0.16 | -0.06 | 0.07  | -0.23 | 0.09  |
| <b>108</b> | -0.15 | 0.03  |       | -0.09 | -0.23 | 0.48  | 0.18  | -0.42 | -0.14 | 0.47  | -0.06 | -0.61 | -0.03 | 0.44  | 0.28  | -0.08 | 0.37  | 0.70  | -0.13 | 0.23  |
| <b>109</b> | 0.07  | -0.31 | -0.08 | -0.20 | -0.20 | 0.23  | -0.16 | -0.63 | -0.42 | -0.32 | 0.10  | 0.59  | -0.75 | -0.13 | -0.49 | -0.06 | -0.23 |       | 1.05  | -0.06 |
| <b>110</b> | 0.01  | -0.43 | 0.26  | 0.41  | -0.47 | -0.19 | -0.16 | -0.17 | 0.68  | -0.43 | -0.53 | -0.04 |       | -0.39 | -0.56 | -0.21 | -0.26 | -0.17 | 0.70  | -0.55 |
| <b>111</b> | 0.35  | 0.08  | -0.04 | -0.69 | -0.27 | -0.05 | -0.48 | -0.11 | 0.23  | 0.01  |       | -0.53 | 0.07  | -0.05 | 0.06  | -0.45 | -0.31 | 0.30  | -0.28 | -0.34 |
| <b>112</b> | 0.50  | 0.00  | -0.10 | -0.70 | -0.06 | -0.09 | 0.26  | -0.31 | -0.64 | -0.98 | 0.07  | -1.96 | -0.33 | 0.00  | 0.39  | 0.17  | 0.06  |       | 0.14  | 0.60  |
| <b>113</b> | -0.58 | -0.25 | -0.54 | 1.55  | 0.37  | -0.66 | 0.00  | -0.42 | -0.52 |       | 0.05  | -0.12 | -0.38 | -0.98 | 0.53  | 0.00  | -0.10 | -0.47 | -0.38 | 0.22  |
| <b>114</b> | -0.27 | 0.22  | -0.20 | -0.34 | -0.60 | -0.30 | -0.40 | -0.23 | -0.01 | -0.35 | 0.27  | -0.67 | -0.86 | -0.36 | 0.98  | -0.03 | -0.37 |       | 0.23  | -0.48 |
| <b>115</b> | 0.08  | -0.73 | 0.14  | -0.59 | 0.85  |       | 0.01  | 0.00  | 0.48  | 0.00  | 0.55  | -0.49 | -0.45 | -0.17 | 0.13  | -0.66 | -0.03 | -0.09 | -0.31 | -0.59 |

|     |       |       |       |       |       |       |       |       |       |       |       |       |       |       |       |       |       |       |       |       |
|-----|-------|-------|-------|-------|-------|-------|-------|-------|-------|-------|-------|-------|-------|-------|-------|-------|-------|-------|-------|-------|
| 116 | -0.01 | 0.99  | -0.28 | -0.65 | -0.94 | -0.58 | 0.03  | -0.46 | 0.28  | -0.20 | 0.31  |       | 0.07  | -0.44 | -0.61 | -0.35 | 0.76  | -0.37 | -0.57 | -1.55 |
| 117 | 1.09  | -0.72 | -0.65 | -0.29 | 0.40  | -0.22 | -0.61 | -0.65 |       | 0.43  | 0.33  | 0.11  | -0.14 | -0.25 | 0.05  | 0.13  | -0.46 | -0.58 | -0.21 | 0.52  |
| 118 | -0.62 |       | -0.31 | -0.92 | -0.50 | -0.13 | -0.06 | -0.45 | -0.06 | -0.85 | -0.03 | 0.16  | -0.49 | 0.13  | 0.41  | 0.06  | 0.21  | -0.03 | -0.14 | 0.78  |
| 119 | 0.01  | 0.72  |       | 0.38  | -0.68 | 0.14  | -0.04 | 0.07  | 0.24  | -0.27 | 0.08  | -0.13 | -1.04 | 0.66  | 0.93  | -0.77 | -0.40 | -0.02 | 0.05  | 0.03  |
| 120 | 0.33  | 0.34  | -0.18 | 0.39  | -0.40 | -0.30 | -0.38 | -0.25 | 0.07  |       | -0.22 | -0.03 | 0.53  | -0.46 | 1.58  | 0.83  | 0.44  | 0.57  | -0.08 | 0.41  |
| 121 | 0.62  | 0.16  | 0.58  | -0.74 | -0.33 | 0.45  | 0.21  | 0.10  | -0.13 | -0.29 | 0.52  | -0.40 |       | 0.36  | -0.44 | 0.08  | 0.50  | 0.25  | 0.25  | -0.02 |
| 122 | -0.65 | -0.93 | -0.32 | 0.59  | -0.01 | -0.32 | -0.57 | 0.59  | -0.69 | -0.41 | -0.09 | 0.60  | -0.43 | -0.23 | -0.30 |       | -0.48 | 0.13  | 1.15  | -0.19 |
| 123 | -0.27 | 0.25  | -0.40 | 0.02  | -0.56 | 0.09  | -0.03 | 0.20  | -0.38 | 0.41  | 0.91  | 0.62  | -0.85 | 0.65  |       | -0.20 | -0.70 | -0.14 | -0.44 | 0.34  |
| 124 | -0.59 | 0.85  | -0.48 | -0.19 | -0.43 | -0.04 | -0.03 | -0.09 | -0.06 | -0.49 | -0.35 | 1.87  | -0.15 | -0.02 | 0.27  | -0.27 |       | 0.23  | -0.20 | -0.40 |
| 125 | -0.03 | -0.54 | 0.83  | -0.48 | 0.14  | 0.13  | -0.55 | -0.28 | -0.26 | -0.63 | -0.18 | -0.16 | -0.23 | -0.95 | -0.26 | 0.47  | -0.84 |       | -0.70 | -0.33 |
| 126 | -0.69 | 0.13  |       | 0.08  | -0.78 | -0.49 | -0.08 | -0.35 | 0.90  | -0.50 | -1.83 | 0.06  | -1.52 | 0.34  | -0.57 | -0.59 | 0.24  | 0.05  | 1.09  | -0.30 |
| 127 | -0.78 | -0.82 | -0.55 | -0.19 | -0.68 | -0.05 | -0.08 | -0.47 | -0.26 | -0.65 | 0.28  | 0.15  | 0.32  | -1.07 | 0.09  | 0.09  |       | -1.00 | -0.50 | -0.25 |
| 128 | -0.77 | 0.58  | -0.71 | -0.85 | -0.22 | -0.50 | -0.15 | 0.31  |       | -0.05 | -0.69 | -0.19 | -0.74 | 0.69  | -0.35 | -0.58 | 0.69  | -0.13 | 0.03  | -0.37 |
| 129 | -0.06 | 0.01  | 0.15  | -0.31 | -0.44 | 0.00  | 0.44  | -1.32 | 0.11  | 0.15  | -0.47 | 0.03  | -0.13 |       | 0.71  | -0.31 | -0.03 | 0.67  | 0.12  | 0.59  |
| 130 |       | -0.33 | 0.06  | 0.80  | -0.04 | 0.31  | 1.04  | -0.24 | -0.69 | 0.00  | -0.58 | -0.27 | 0.00  | 0.08  | -0.51 | -0.49 | -0.65 | 0.28  | 0.49  | 0.10  |
| 131 | -0.14 | -0.43 | 0.02  | 0.13  | 0.69  | -0.12 | 0.15  | 0.55  | 0.13  | -0.32 | -0.21 | -0.09 | -0.44 |       | -0.28 | -0.54 | 0.13  | -0.18 | -0.15 | 0.78  |
| 132 | -0.21 | -0.32 |       | -0.11 | 0.04  | 0.19  | 0.33  | -0.79 | 1.32  | 0.12  | 0.69  | 0.38  | 0.11  | -0.65 | -0.29 | -0.07 | -0.41 | 0.13  | 0.30  | 0.13  |
| 133 | 0.25  | 0.46  | -0.09 | -0.37 | -0.40 | -0.28 | 0.25  | 0.46  | -0.80 |       | -0.44 | 0.48  | -0.18 | -0.60 | 0.45  | 0.53  | 0.75  | -0.13 | 1.23  | 0.91  |
| 134 |       | -0.22 | 0.13  | 0.67  | -0.38 | -0.18 | 0.24  | 0.02  | -0.11 | -0.17 | -0.46 | 0.13  | -0.86 | -0.47 | -0.46 | -0.34 | 0.03  | -0.91 | 0.30  | -0.18 |
| 135 | 0.39  | -0.27 | -0.26 | -0.11 | -0.20 | -0.38 | -0.66 | -0.02 | -0.05 | -0.32 | -0.20 | 0.11  | 0.35  | 0.05  |       | 0.35  | -0.13 | -0.31 | 0.35  | 0.56  |
| 136 | 0.25  | 0.07  | -0.46 | -0.87 | -0.14 | 0.52  | 0.23  | 1.68  | -0.54 | -0.05 | 0.09  | 0.31  | 0.33  | -0.81 | 0.13  |       | 0.31  | -0.62 | -0.38 | -0.04 |
| 137 | -0.33 | 0.10  | 0.30  | -0.46 | -0.44 | 0.90  | -0.24 | 0.11  | -0.29 | -0.11 | 0.16  | -0.66 | -0.22 | -0.09 | -1.01 | -0.45 | 0.21  | 0.11  | 0.69  |       |
| 138 | 0.05  | -0.13 | -0.23 | -0.21 | -0.05 |       | -0.20 | 0.00  | 0.08  | 0.69  | 0.72  | 0.40  | -0.25 | 0.09  | -0.22 | -0.08 | 0.48  | 0.16  | 0.46  | -0.52 |
| 139 | -0.13 | -0.12 | -0.53 | -0.60 | -0.04 | -0.19 | 0.63  |       | -0.33 | -0.10 | 0.01  | -0.20 | 0.07  | -0.12 | 0.07  | 0.08  | 0.04  | -0.51 | -0.30 | 0.11  |
| 140 | 0.10  | -0.80 | 0.03  | -0.54 | -0.48 | 0.44  | -0.96 | 0.33  | 1.02  | -0.40 | -0.46 | -0.03 |       | 0.56  | 0.14  | 0.63  | 0.29  | -0.05 | 0.29  | 0.25  |
| 141 | -0.86 | -0.77 | -0.36 | -0.57 |       | -0.73 | 0.06  | -0.43 | -0.38 | -0.10 | 0.20  | -0.32 | -0.20 | -0.61 | 0.42  | -0.74 | 0.18  | -0.49 | -0.37 | -0.25 |
| 142 | -0.03 | -0.06 | -0.39 | -0.06 | 0.62  | -0.09 | -0.06 |       | 0.51  | -0.26 | 0.36  | -0.19 | 0.07  | -0.06 | -0.29 | 0.87  | 0.86  | -1.35 | -0.06 | -0.06 |
| 143 | -0.86 | 1.06  | -0.07 |       | 0.48  | -0.42 | 0.04  | -0.44 | -0.04 | 0.15  | 0.24  | 0.17  | 0.03  | -0.13 | 0.33  | -0.33 | 0.09  | 0.08  | -0.40 | -0.54 |
| 144 | -1.16 | 1.01  | -1.24 | 0.06  | 0.03  | -0.96 | -0.36 | 0.36  | 0.06  | 0.43  | 0.33  | 0.02  | -0.30 | -0.56 | -0.50 | 0.13  |       | 0.68  | 0.55  | -0.68 |
| 145 | 0.00  | -0.72 | -0.27 | 1.63  | 0.11  | 0.95  | 0.17  | -0.17 | 0.15  | -0.29 | 0.93  | -0.12 | 1.19  | 0.46  | -0.06 |       | -0.29 | -0.54 | 0.44  | 0.15  |
| 146 |       | -0.85 | 0.09  | -0.23 | 0.16  | -0.58 | -0.63 | -0.40 | -0.37 | 0.19  | -0.29 | -0.50 | 0.27  | -1.06 | -0.39 | -0.27 | -0.04 | 0.09  | -1.09 | -0.65 |
| 147 | -0.02 | -0.21 | 0.17  | -0.41 | 0.29  | -0.19 | -0.37 | -0.39 |       | -0.63 | 0.88  | -0.98 | -0.82 | 0.00  | 0.23  | -0.33 | -0.66 | -0.52 | 0.45  | 0.52  |
| 148 | -0.52 | -0.22 | -0.80 | -0.18 | -0.31 | -0.17 | 0.23  | -0.01 | -0.19 | -1.01 | -0.19 | 0.90  | 0.65  | -0.14 | 0.26  | 0.81  |       | -0.73 | -1.00 | 0.17  |
| 149 | -0.81 | 0.46  | 0.17  | -0.89 | 0.08  | -0.23 | -0.33 | 0.20  | -0.16 | 0.55  | 0.54  | -0.24 | 0.40  | -0.42 |       | -0.13 | 0.10  | 0.97  | -0.91 | -0.29 |
| 150 | -0.18 | -0.06 | -0.21 | 0.48  | -0.37 | 0.30  | -0.20 | -0.57 | 0.18  | 0.13  | -0.49 | 0.58  | -0.14 |       | -0.36 | -0.23 | -0.07 | -0.42 | -0.44 | -0.55 |
| 151 | 0.47  | -1.14 | -0.60 | 0.50  | -1.10 | -0.83 | -0.09 | -0.03 | -0.53 | 0.89  | 0.13  | -1.18 | -0.92 | 0.14  |       | -0.17 | -0.30 | 0.39  | -0.63 | 0.19  |
| 152 | -0.19 | 1.20  | -0.76 | -0.03 | 0.10  | -0.57 | -0.46 | 0.02  | 0.16  | 0.24  | 0.35  | 0.23  | 0.07  | 0.63  | 0.49  | 0.37  | -0.07 |       | 0.62  | -0.40 |
| 153 | 0.39  | 0.06  | 0.11  |       | -0.24 | 0.44  | 0.00  | 0.87  | 0.30  | 0.26  | 0.73  | -0.38 | -0.62 | 0.66  | 0.22  | 0.43  | -0.55 | 0.23  | 0.38  | 0.17  |
| 154 | 0.28  | 0.00  |       | 0.34  | -0.01 | 0.21  | 0.51  | -0.50 | 0.23  | 0.22  | -0.04 | 0.66  | 0.17  | 0.01  | 0.05  | 0.19  | -0.47 | 0.20  | -1.18 | -0.17 |

|     |       |       |       |       |       |       |       |       |       |       |       |       |       |       |       |       |       |       |       |       |
|-----|-------|-------|-------|-------|-------|-------|-------|-------|-------|-------|-------|-------|-------|-------|-------|-------|-------|-------|-------|-------|
| 155 |       | 0.27  | -0.16 | 0.72  | 0.05  | -0.47 | 0.58  | 0.48  | -0.01 | 0.15  | 0.40  | 0.07  | 0.38  | 0.20  | -0.42 | -0.10 | 0.78  | 0.14  | 0.85  | 0.19  |
| 156 | -0.19 | 0.02  | -0.73 | -0.73 |       | -0.21 | 0.42  | 0.93  | 0.18  | 0.90  | 0.50  | -0.34 | 0.54  | -0.08 | 1.07  | -0.38 | -0.39 | -0.42 | 0.69  | 0.56  |
| 157 | -0.34 | 0.82  | -0.34 | -0.11 | 0.16  | -0.73 | 0.22  | 0.58  | 0.05  | -0.23 | 0.01  | -0.06 | -0.34 | -0.19 | 0.85  | 0.14  | -0.33 | -0.19 | -0.13 |       |
| 158 | -0.01 | -0.38 | -0.31 | 0.34  | -0.49 | 0.22  | 0.45  | 0.42  | 0.05  | -0.35 | -0.07 | -0.44 | -0.28 | -0.13 | -0.21 | 0.24  |       | -0.01 | 0.04  | -0.14 |
| 159 | 0.02  | 0.20  | -0.34 | 0.27  | -0.16 | 0.05  | -0.43 | -0.46 | -0.85 |       | 0.55  | -0.17 | 0.54  | 0.16  | 0.24  | -0.57 | -0.14 | 0.08  | 0.14  | 0.30  |
| 160 | -0.84 | -0.17 | -0.95 | 0.56  | 0.73  | -0.06 | -0.04 | -0.07 | -0.02 | 0.30  | -0.28 | 0.49  | -0.40 | -0.20 | -0.56 | 0.40  | 0.31  |       | -0.53 | -0.15 |
| 161 | -0.74 | -0.09 | -0.82 | 0.13  | -0.62 | -0.13 | -0.06 | -0.74 | 0.16  | 0.29  | -0.38 | -0.43 | -0.71 | 0.20  |       | -0.13 | -0.91 | -0.74 | -0.36 | 0.09  |
| 162 | -0.30 | -0.37 | -0.05 |       | -0.07 | -0.26 | -0.21 | -0.40 | 1.04  | -0.05 | -0.22 | -0.11 | 0.07  | 0.09  | -0.50 | -0.50 | -0.04 | 0.39  | -0.36 | -0.51 |
| 163 | -0.08 | -0.46 | -1.15 | -0.38 | 0.97  | -0.16 | 0.25  |       | -0.12 | -0.26 | -0.35 | 0.60  | -0.52 | -0.58 | -0.20 | 0.04  | -0.22 | -0.04 | 0.10  | 0.10  |
| 164 | -0.19 | -0.20 | -0.32 | -0.82 | -0.72 | -0.24 | -0.60 | -0.13 | 0.28  | -0.87 | -0.66 | 0.35  | 0.13  | -0.39 |       | 0.29  | -0.49 | -0.32 | -0.23 | -0.31 |
| 165 | -0.34 | -1.03 | 0.33  | 0.12  | -1.11 | -0.51 | -0.68 | -0.48 | -0.37 | 0.43  | -0.16 | 0.18  | -0.48 |       | 0.01  | 0.00  | -0.53 | 0.07  | 0.09  | -0.34 |
| 166 | 0.33  | -0.18 | 0.05  | 0.86  | -0.02 | -0.25 | -0.15 | -0.13 | -0.66 | 0.42  | 0.23  | -0.62 | -0.40 | 0.43  | -0.48 | -1.04 | -0.38 | -0.30 | 0.43  |       |
| 167 | -0.34 | 0.10  | -0.14 | -0.23 | 0.15  | -0.55 | -0.23 | 0.16  | -0.16 | -0.19 | -0.44 | -0.52 | 0.01  | -0.31 |       | -0.32 | 0.48  | 0.06  | -0.96 | 0.48  |
| 168 | 0.77  | 0.01  | 0.56  | 0.60  | -0.08 | 0.12  | 0.16  | -0.52 | 0.02  |       | -0.08 | -0.26 | -0.67 | 0.11  | -0.50 | 0.04  | -0.68 | -0.09 | 0.33  | 0.30  |
| 169 | -0.65 | -0.11 | -0.08 | -0.58 | 0.50  | -0.13 | 0.29  | -0.20 |       | -0.53 | -0.12 | 0.65  | -0.12 | -0.34 | -0.41 | 0.15  | -0.18 | 0.46  | 0.04  | -0.02 |
| 170 | -0.65 | 0.48  | -0.72 | 1.49  | -0.19 | -0.99 | -0.37 | 0.23  |       | -0.17 | 0.10  | -0.51 | -0.99 | -0.76 | -0.05 | 0.27  | 0.34  | -0.17 | 0.34  | -0.12 |
| 171 | -0.12 | -0.51 | 0.06  | -0.24 | -0.40 | -0.32 | 0.30  |       | 0.12  | -0.61 | 0.00  | 0.36  | -0.92 | 0.41  | -0.06 | 0.20  | -0.27 | -0.23 | -0.11 | 0.46  |
| 172 | 0.22  | -0.61 | 0.27  | 0.45  | 0.00  | -0.41 | 0.76  | 0.33  | 0.73  | 0.23  | 0.56  | 0.31  | 0.51  | 0.33  | 0.19  |       | 0.29  | -0.26 | -0.42 | -0.32 |
| 173 | -0.52 | -0.54 | -0.25 | -0.95 | -0.24 | 0.45  | 0.43  | -0.49 |       | 0.54  | 0.45  | 1.55  | -0.91 | 0.69  | 0.33  | -0.07 | 0.10  | -0.10 | 0.54  | -0.40 |
| 174 | -0.87 | 0.70  | 0.44  |       | 0.68  | 0.75  | -0.80 | -0.62 | 0.20  | -0.16 | -0.25 | 0.15  | 0.59  | 0.41  | 0.78  | 0.29  | 0.54  | 0.16  | 0.04  | -0.40 |
| 175 | -0.15 | 0.20  | -0.06 |       | 0.10  | -0.56 | -0.05 | -0.44 | -0.28 | -0.46 | -0.12 | 0.17  | 0.24  | -0.63 | -0.43 | -0.31 | 0.25  | -0.13 | 0.30  | -0.68 |
| 176 | 0.04  | 0.01  | -0.26 | -0.43 | 0.13  | -1.02 | 0.08  | 0.25  |       | 0.54  | 1.22  | 0.26  | -0.21 | -0.43 | 0.48  | 0.11  | 0.66  | 0.64  | -0.65 | 0.28  |
| 177 | 0.07  | 0.34  | -0.03 | -0.01 | -0.61 | -0.22 | -0.42 | 0.17  | -1.04 | -0.50 | -0.34 | -0.48 | -0.38 | 0.51  | 0.68  | -0.27 |       | -0.40 | 0.30  | -0.18 |
| 178 | -0.19 | -0.92 | 0.38  | -0.35 | -0.67 | 0.15  | 0.16  | -0.73 | 0.24  | 0.71  | -0.60 | -0.07 |       | -0.14 | -0.63 | -0.33 | 0.52  | -0.30 | -0.62 | 0.77  |
| 179 | -0.56 | 0.01  | -0.91 | -0.35 | 0.23  |       | -0.22 | 0.03  | 0.45  | -0.40 | -0.12 | 0.41  | -0.83 | 0.21  | -0.32 | 0.56  | -0.09 | -0.16 | 0.21  | -0.03 |
| 180 | -0.68 |       | -0.14 | 0.07  | -0.21 | 0.04  | -0.34 | -0.52 | -0.22 | 0.22  | -0.32 | 0.27  | -0.22 | 1.65  | -1.43 | 0.40  | -0.29 | 0.43  | -0.12 | -0.15 |
| 181 | 0.56  | -0.33 | -0.18 | -0.10 | -0.07 | 0.35  | 0.31  | -0.47 | -0.42 | -0.88 | -0.25 | -0.51 | 0.77  | -0.15 | 0.07  | 0.12  | -0.24 |       | -0.67 | -0.29 |
| 182 | -0.67 | -0.34 | 0.03  | 0.19  | -0.03 | -0.30 | -0.36 | -0.18 |       | 0.08  | -0.03 | -0.27 | -0.26 | 0.00  | 0.14  | -0.52 | 0.16  | -0.65 | -0.08 | -0.42 |
| 183 | -0.23 | -0.03 | -0.42 | -0.01 | -0.53 | -1.01 | 0.69  |       | -0.30 | -0.45 | -0.28 | -0.27 | 0.34  | -1.01 | -0.07 | 0.15  | -0.18 | -0.64 | -0.23 | -0.26 |
| 184 | 0.36  | 0.04  | 0.71  | 0.01  | 0.12  | -0.50 | 1.38  | 0.19  |       | -0.42 | -0.81 | 0.30  | 0.24  | -0.18 | -0.12 | 0.10  | -0.34 | -0.04 | -0.84 | -0.42 |
| 185 | -0.30 | -0.23 | -0.12 | -0.61 | 0.64  | 0.26  | -0.46 | 0.10  |       | 0.25  | -0.60 | -0.41 | 0.09  | -0.40 | -0.32 | -0.72 | -0.02 | 0.18  | -0.32 | 0.83  |
| 186 | -0.31 |       | -0.06 | -0.33 | 0.06  | -1.18 | -0.80 | 0.37  | -0.24 | -0.30 | -0.14 | -0.14 | -0.89 | 0.18  | -0.26 | 0.21  | 0.21  | 0.15  | -0.48 | 1.01  |
| 187 | 0.16  | -0.02 | -0.47 | -0.29 | -0.77 | -0.29 | -0.03 |       | -0.78 | -0.04 | 0.03  | 0.51  | 0.17  | -0.29 | -0.07 | -1.11 | -0.13 | 0.45  | 0.09  | 0.40  |
| 188 | 0.00  | -0.88 | 0.31  | -0.63 | -0.07 | -0.48 | -0.96 |       | -0.17 | 0.09  | -0.42 | 0.60  | -0.06 | -0.13 | -0.46 | -0.33 | 0.36  | -0.35 | -1.12 | -0.05 |
| 189 | 0.04  | -0.54 | -0.70 | -0.40 | -0.79 | -0.26 | -0.47 | 0.43  | 0.22  | 0.11  |       | 0.04  | -0.70 | 0.12  | -0.47 | -0.18 | -0.82 | 0.61  | -0.35 | -0.52 |

**Table S2. The total number of KRAS germline variants from three databases: gnomAD non-cancer samples, UK biobank non-cancer samples, FMI predicted germline mutations.**

| position | A | C  | D   | E | F | G | H | I | K | L | M | N | P | Q | R  | S | T | V | W | Y | Total |
|----------|---|----|-----|---|---|---|---|---|---|---|---|---|---|---|----|---|---|---|---|---|-------|
| 2        | 0 | 0  | 0   | 0 | 0 | 0 | 0 | 0 | 0 | 0 | 0 | 0 | 0 | 0 | 0  | 2 |   | 0 | 0 | 0 | 2     |
| 3        | 0 | 0  | 0   |   | 0 | 0 | 0 | 0 | 0 | 0 | 0 | 0 | 0 | 0 | 0  | 0 | 0 | 0 | 0 | 0 | 0     |
| 4        | 0 | 0  | 0   | 0 | 0 | 0 | 0 | 0 | 0 | 0 | 0 | 0 | 0 | 0 | 0  | 0 | 0 | 0 | 0 |   | 0     |
| 5        | 0 | 0  | 0   | 1 | 0 | 0 | 0 | 0 |   | 0 | 0 | 0 | 0 | 1 | 0  | 0 | 0 | 0 | 0 | 0 | 2     |
| 6        | 0 | 0  | 0   | 0 | 0 | 0 | 0 | 0 | 0 |   | 0 | 0 | 0 | 0 | 0  | 0 | 0 | 2 | 0 | 0 | 2     |
| 7        | 0 | 0  | 0   | 0 | 0 | 0 | 0 | 0 | 0 | 0 | 0 | 0 | 0 | 0 | 0  | 0 | 0 |   | 0 | 0 | 0     |
| 8        | 1 | 0  | 0   | 0 | 0 | 0 | 0 | 0 | 0 | 0 | 0 | 0 | 0 | 0 | 0  | 0 | 0 |   | 0 | 0 | 1     |
| 9        | 1 | 0  | 0   | 0 | 0 | 0 | 0 | 0 | 0 | 0 | 0 | 0 | 0 | 0 | 0  | 0 | 0 |   | 0 | 0 | 1     |
| 10       | 0 | 0  | 0   | 0 | 0 |   | 0 | 0 | 0 | 0 | 0 | 0 | 0 | 0 | 0  | 0 | 0 | 0 | 0 | 0 | 0     |
| 11       |   | 0  | 0   | 0 | 0 | 0 | 0 | 0 | 0 | 0 | 0 | 0 | 0 | 0 | 0  | 0 | 0 | 0 | 0 | 0 | 0     |
| 12       | 0 |    | 0   | 0 | 0 | 0 | 0 | 0 | 0 | 0 | 0 | 0 | 0 | 0 | 0  | 3 | 0 | 0 | 0 | 0 | 3     |
| 13       | 0 | 23 | 163 | 1 | 1 |   | 1 | 0 | 0 | 0 | 0 | 0 | 1 | 0 | 10 | 0 | 0 | 3 | 0 | 0 | 203   |
| 14       | 0 | 0  | 0   | 0 | 0 | 0 | 0 | 3 | 0 | 0 | 0 | 0 | 0 | 0 | 0  | 0 | 0 |   | 0 | 0 | 3     |
| 15       | 0 | 0  | 0   | 0 | 0 |   | 0 | 0 | 0 | 0 | 0 | 0 | 0 | 0 | 0  | 0 | 0 | 0 | 0 | 0 | 0     |
| 16       | 0 | 0  | 0   | 0 | 0 | 0 | 0 | 0 |   | 0 | 0 | 0 | 0 | 0 | 0  | 0 | 0 | 0 | 0 | 0 | 0     |
| 17       | 0 | 0  | 0   | 0 | 0 | 0 | 0 | 0 | 0 | 0 | 0 | 0 | 0 | 0 | 0  |   | 0 | 0 | 0 | 0 | 0     |
| 18       |   | 0  | 0   | 0 | 0 | 0 | 0 | 0 | 0 | 0 | 0 | 0 | 0 | 0 | 0  | 0 | 0 | 0 | 0 | 0 | 0     |
| 19       | 0 | 0  | 0   | 0 | 4 | 0 | 0 | 0 | 0 |   | 0 | 0 | 0 | 0 | 0  | 0 | 0 | 0 | 0 | 0 | 4     |
| 20       | 0 | 0  | 0   | 0 | 0 | 0 | 0 | 0 | 0 | 0 | 0 | 0 | 0 | 0 | 0  | 1 |   | 0 | 0 | 0 | 1     |
| 21       | 0 | 0  | 0   | 0 | 0 | 0 | 0 |   | 0 | 0 | 0 | 0 | 0 | 0 | 0  | 0 | 0 | 0 | 0 | 0 | 0     |
| 22       | 0 | 0  | 0   | 0 | 0 | 0 | 0 | 0 | 5 | 0 | 0 | 0 | 0 |   | 1  | 0 | 0 | 0 | 0 | 0 | 6     |
| 23       | 0 | 0  | 0   | 0 | 0 | 0 | 0 | 0 | 0 |   | 0 | 0 | 0 | 0 | 0  | 0 | 0 | 0 | 0 | 0 | 0     |
| 24       | 0 | 0  | 0   | 0 | 1 | 0 | 0 |   | 0 | 0 | 0 | 0 | 0 | 0 | 0  | 0 | 0 | 0 | 0 | 0 | 1     |
| 25       | 0 | 0  | 0   | 0 | 0 | 0 | 1 | 0 | 0 | 0 | 0 | 0 | 0 |   | 0  | 0 | 0 | 0 | 0 | 0 | 1     |
| 26       | 0 | 0  | 0   | 0 | 0 | 0 | 0 | 0 | 0 | 0 | 0 |   | 0 | 0 | 0  | 0 | 0 | 0 | 0 | 1 | 1     |
| 27       | 0 | 0  | 0   | 0 | 0 | 0 |   | 0 | 0 | 0 | 0 | 0 | 0 | 0 | 0  | 0 | 0 | 0 | 0 | 0 | 0     |
| 28       | 0 | 0  | 0   | 0 |   | 0 | 0 | 0 | 0 | 0 | 0 | 0 | 0 | 0 | 0  | 0 | 0 | 0 | 0 | 0 | 0     |
| 29       | 0 | 0  | 0   | 0 | 0 | 0 | 0 | 0 | 0 | 1 | 1 | 0 | 0 | 0 | 0  | 0 | 0 |   | 0 | 0 | 2     |
| 30       | 0 | 0  |     | 0 | 0 | 0 | 0 | 0 | 0 | 0 | 0 | 0 | 0 | 0 | 0  | 0 | 0 | 0 | 0 | 0 | 0     |
| 31       | 0 | 0  | 0   |   | 0 | 0 | 0 | 0 | 0 | 0 | 0 | 0 | 0 | 0 | 0  | 0 | 0 | 0 | 0 | 0 | 0     |
| 32       | 0 | 0  | 0   | 0 | 0 | 0 | 0 | 0 | 0 | 0 | 0 | 0 | 0 | 0 | 0  | 0 | 0 | 0 | 0 |   | 0     |
| 33       | 0 | 0  |     | 2 | 0 | 0 | 0 | 0 | 0 | 0 | 0 | 0 | 0 | 0 | 0  | 0 | 0 | 0 | 0 | 0 | 2     |
| 34       | 0 | 0  | 0   | 0 | 0 | 0 | 0 | 0 | 0 | 1 | 0 | 0 |   | 0 | 0  | 0 | 0 | 0 | 0 | 0 | 1     |
| 35       | 0 | 0  | 0   | 0 | 0 | 0 | 0 | 0 | 0 | 0 | 0 | 0 | 0 | 0 | 0  | 0 |   | 0 | 0 | 0 | 0     |





















**Table S4. Variants selected for validation based on Z-score analysis and data mining results.**

| <b>Mutation</b> | <b>Z-score sotarasib</b> | <b>Z-score adagrasib</b> | <b>Sotarasib contact</b> | <b>Adagrasib contact</b> | <b>Number of appearances in non-cancer samples</b> | <b>Number of appearances co-occurring with G12C</b> | <b>Rationale to validation*</b>                                                                     |
|-----------------|--------------------------|--------------------------|--------------------------|--------------------------|----------------------------------------------------|-----------------------------------------------------|-----------------------------------------------------------------------------------------------------|
| <b>V8A</b>      | 1.951673                 | 1.606707                 |                          |                          | 1                                                  |                                                     | Strong resistance to both inhibitors; Appearance in human genetics data bases.                      |
| <b>V8L</b>      | 3.075859                 | 1.384441                 |                          |                          |                                                    | 1                                                   | Strong resistance to sotarasib, moderate resistance to adagrasib; Co-occurrence with G12C.          |
| <b>V9Y</b>      | 3.409726                 | 3.57059                  | 1                        | 1                        |                                                    |                                                     | Strong resistance to both inhibitors.                                                               |
| <b>S17E</b>     | -1.82558                 | -1.637517                |                          |                          |                                                    |                                                     | Strong sensitization to both inhibitors.                                                            |
| <b>T58I</b>     | 1.839508                 | 0.641543                 | 1                        | 1                        |                                                    | 1                                                   | Strong resistance to sotarasib; Co-occurrence with G12C.                                            |
| <b>A59T</b>     | 1.047726                 | -0.201466                | 1                        | 1                        | 1                                                  | 1                                                   | Moderate resistance to sotarasib; Appearance in human genetics data bases; Co-occurrence with G12C. |
| <b>S65W</b>     | -0.37291                 | 2.011415                 |                          |                          |                                                    |                                                     | Differential responses to inhibitors, only strong resistance to adagrasib.                          |
| <b>R68L</b>     | 3.465126                 | 4.342864                 | 1                        | 1                        |                                                    |                                                     | Strong resistance to both inhibitors.                                                               |

|             |          |          |   |   |   |   |                                                                                                                     |
|-------------|----------|----------|---|---|---|---|---------------------------------------------------------------------------------------------------------------------|
| <b>R68S</b> | 1.257671 | 2.667666 | 1 | 1 |   | 1 | Strong resistance to adagrasib, moderate resistance to sotarasib; Co-occurrence with G12C.                          |
| <b>D69P</b> | -0.60117 | 1.443494 |   | 1 |   |   | Differential responses to inhibitors, moderate resistance to adagrasib; Only in close contact with adagrasib.       |
| <b>M72I</b> | 0.564598 | 1.376383 | 1 | 1 |   | 1 | Differential responses to inhibitors, moderate resistance to adagrasib; Co-occurrence with G12C.                    |
| <b>D92R</b> | 1.557047 | 2.532933 |   | 1 |   |   | Strong resistance to both inhibitors; Only in close contact with adagrasib.                                         |
| <b>H95N</b> | 0.223259 | 2.5969   | 1 | 1 | 3 |   | Differential responses to inhibitors, only strong resistance to adagrasib; Appearance in human genetics data bases. |
| <b>H95V</b> | -0.61616 | 1.987048 | 1 | 1 |   |   | Differential responses to inhibitors, only strong resistance to adagrasib.                                          |
| <b>Y96H</b> | 2.711728 | 2.09831  | 1 | 1 |   |   | Strong resistance to both inhibitors.                                                                               |
| <b>Q99F</b> | 0.131322 | 2.505669 | 1 | 1 |   |   | Differential responses to inhibitors, only strong resistance to adagrasib.                                          |
| <b>Q99W</b> | 2.020524 | 4.70395  | 1 | 1 |   |   | Strong resistance to both inhibitors.                                                                               |



|              |          |          |  |  |   |   |                                                                                                     |
|--------------|----------|----------|--|--|---|---|-----------------------------------------------------------------------------------------------------|
| <b>F156L</b> | 1.306172 | 0.895185 |  |  | 1 | 2 | Moderate resistance to sotarasib; Appearance in human genetics data bases; Co-occurrence with G12C. |
|--------------|----------|----------|--|--|---|---|-----------------------------------------------------------------------------------------------------|

\* Strong resistance defined as z-score > 1.5; strong sensitization defined as z-score < -1.5; moderate resistance defined as  $1 < \text{z-score} < 1.5$ .
